# Supplementary material
Source: PubMed Central journal article supplement (PMC3459651)

## Supporting Information Section

# One-Pot Phosphine-Catalyzed Quinoline Synthesis

*San N. Khong and Ohyun Kwon\**

Department of Chemistry and Biochemistry, University of California, Los Angeles,

607 Charles E. Young Dr. East, Los Angeles, California 90095-1569

### Contents

|                                                                                    |    |
|------------------------------------------------------------------------------------|----|
| <sup>1</sup> H and <sup>13</sup> C NMR spectra of Dihydroquinoline <b>3a</b> ..... | S2 |
| <sup>1</sup> H and <sup>13</sup> C NMR spectra of Quinolines <b>4</b> .....        | S3 |

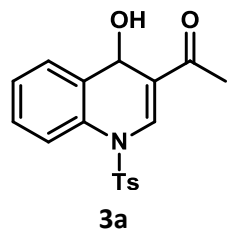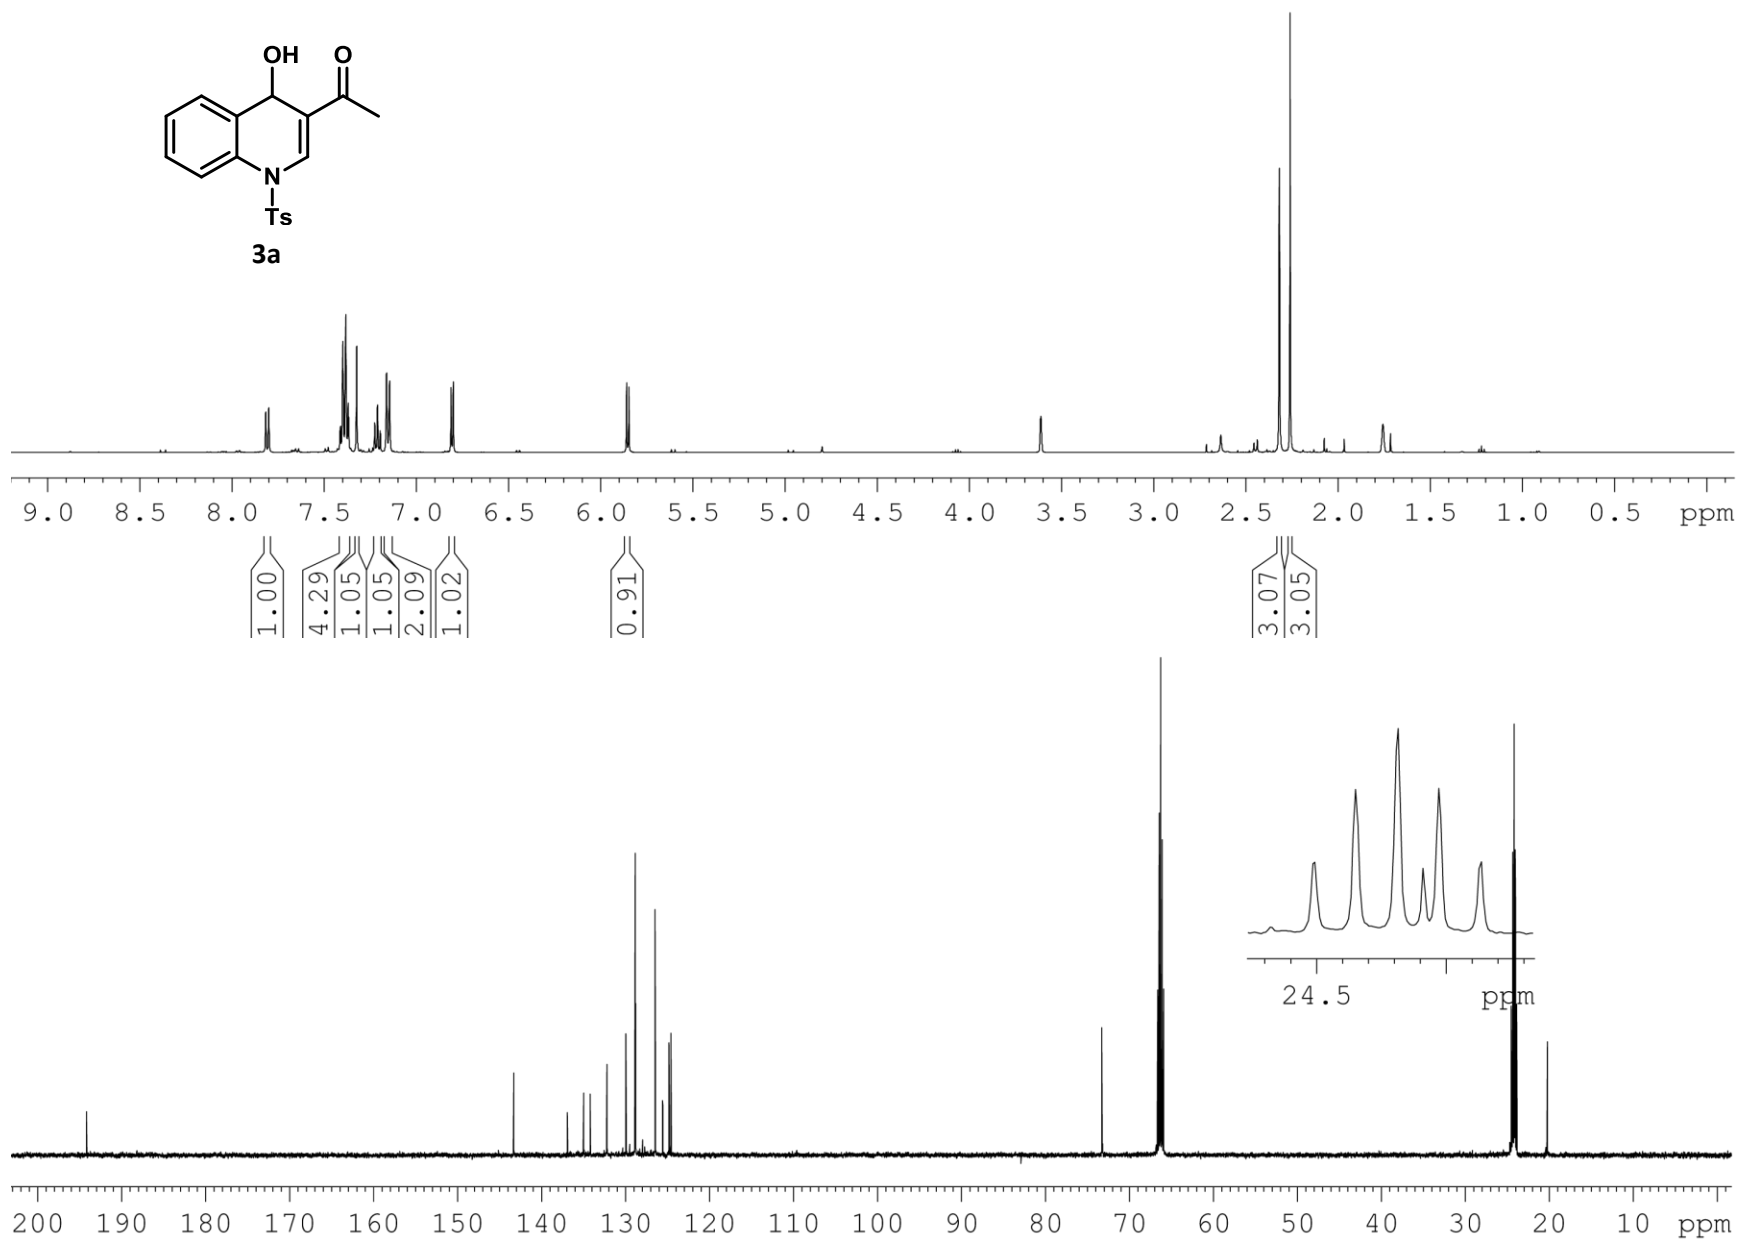

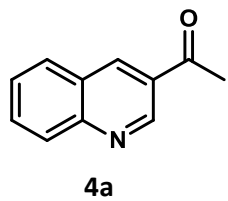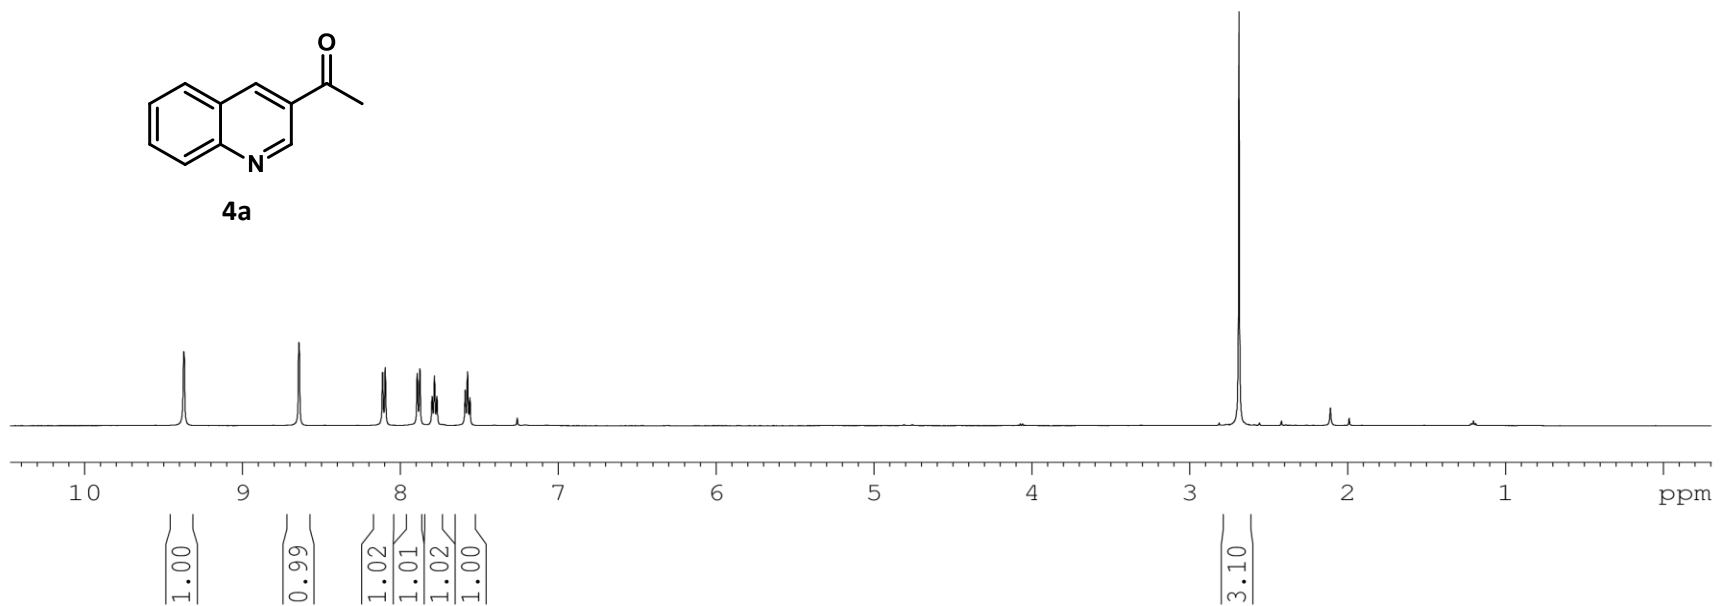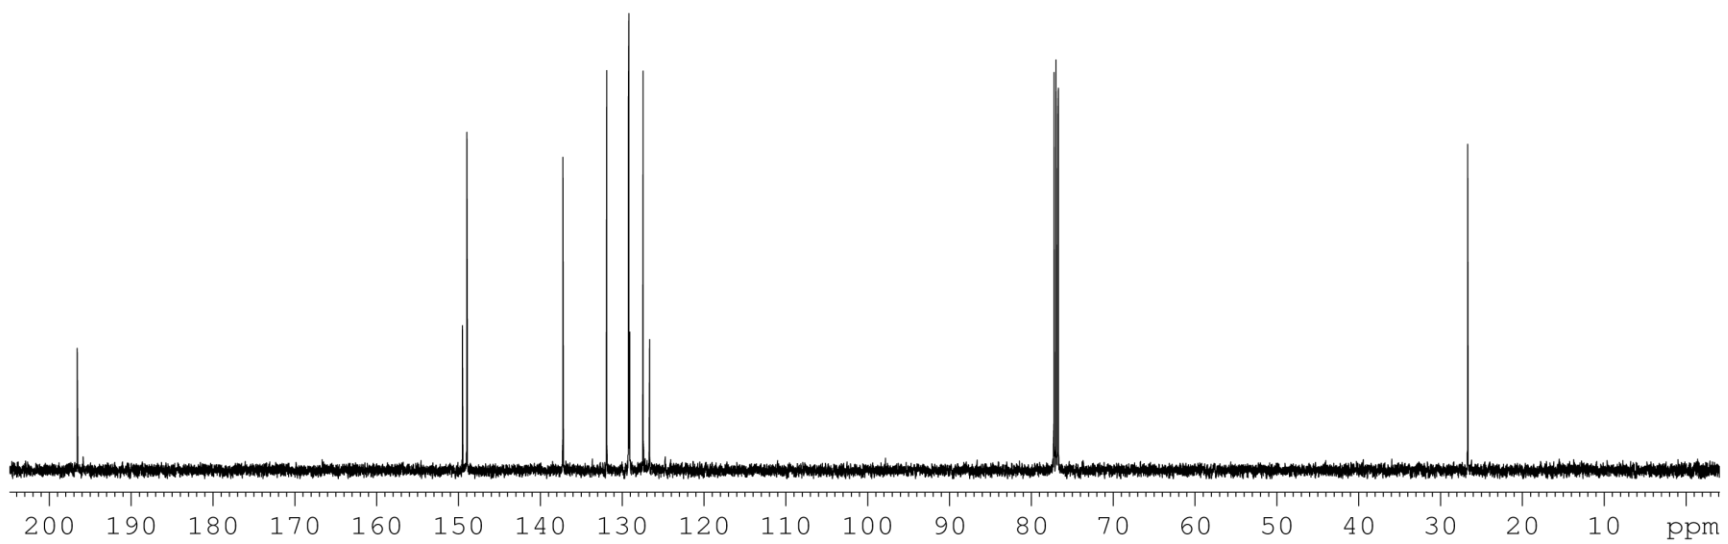

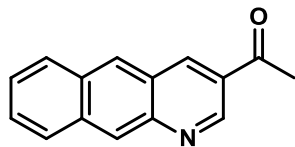

4b

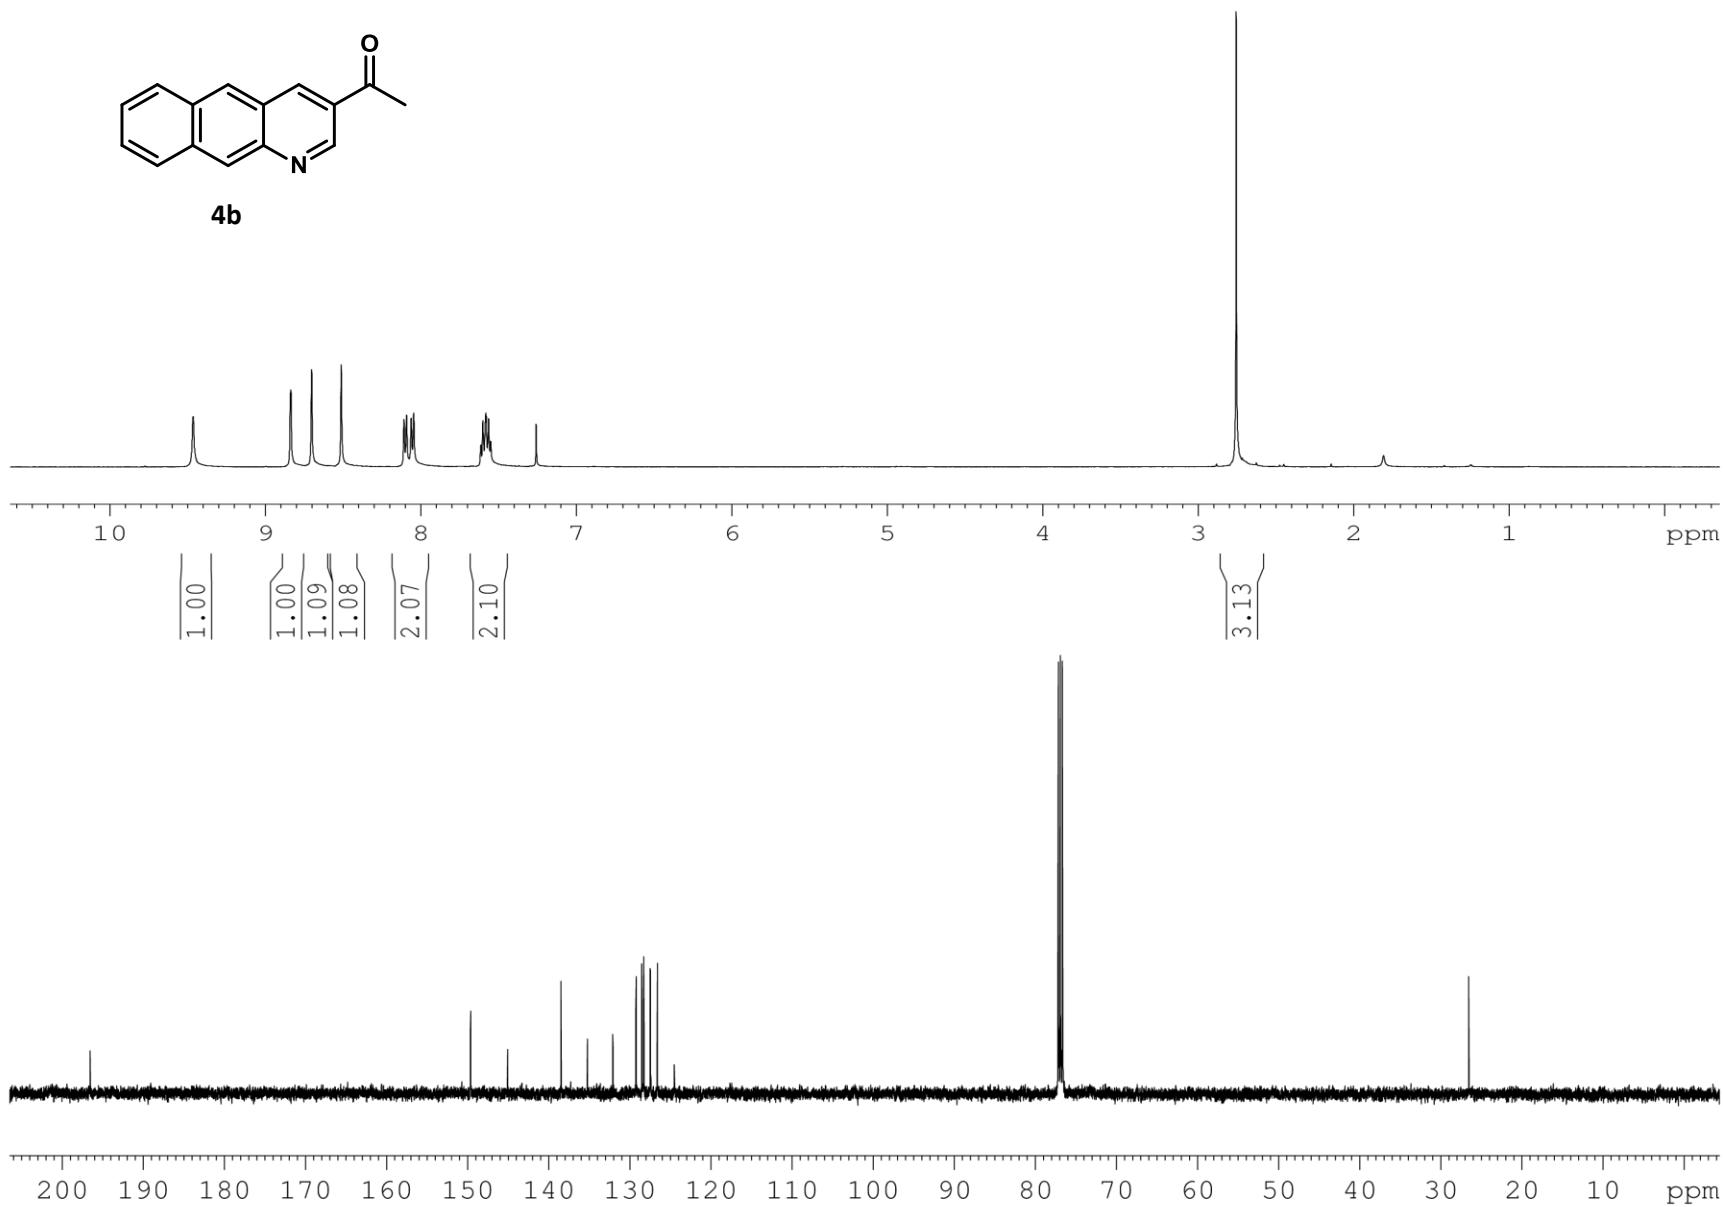

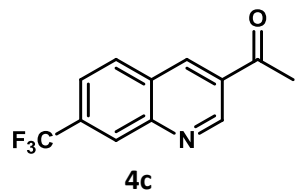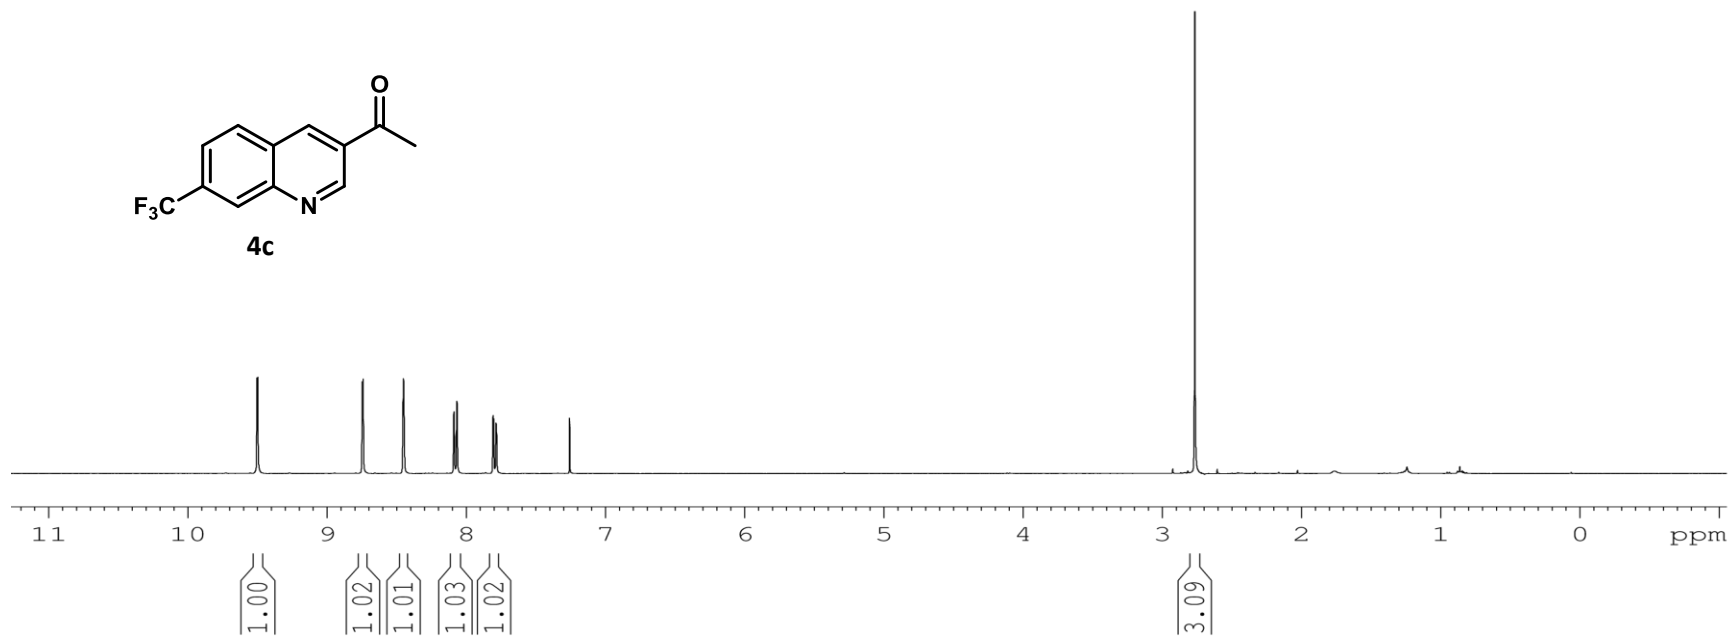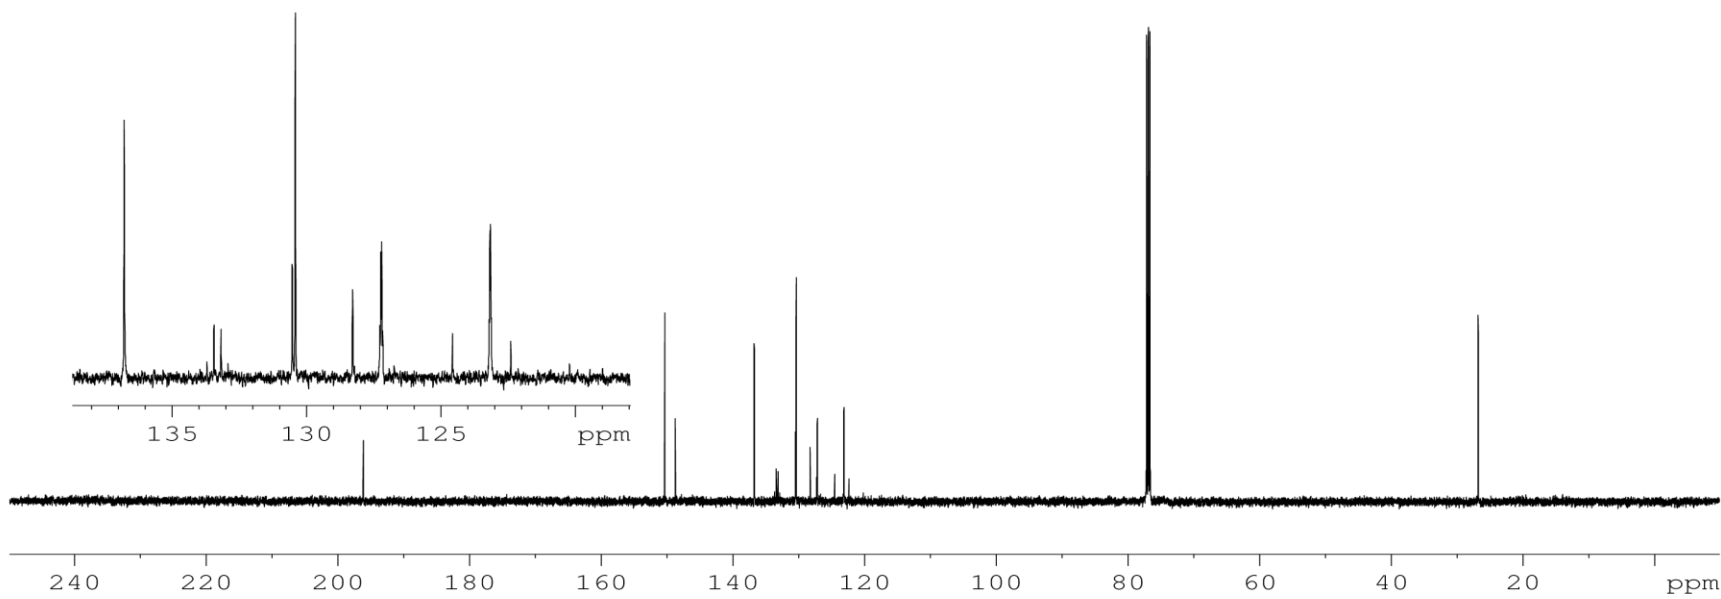

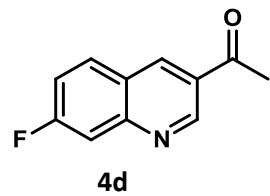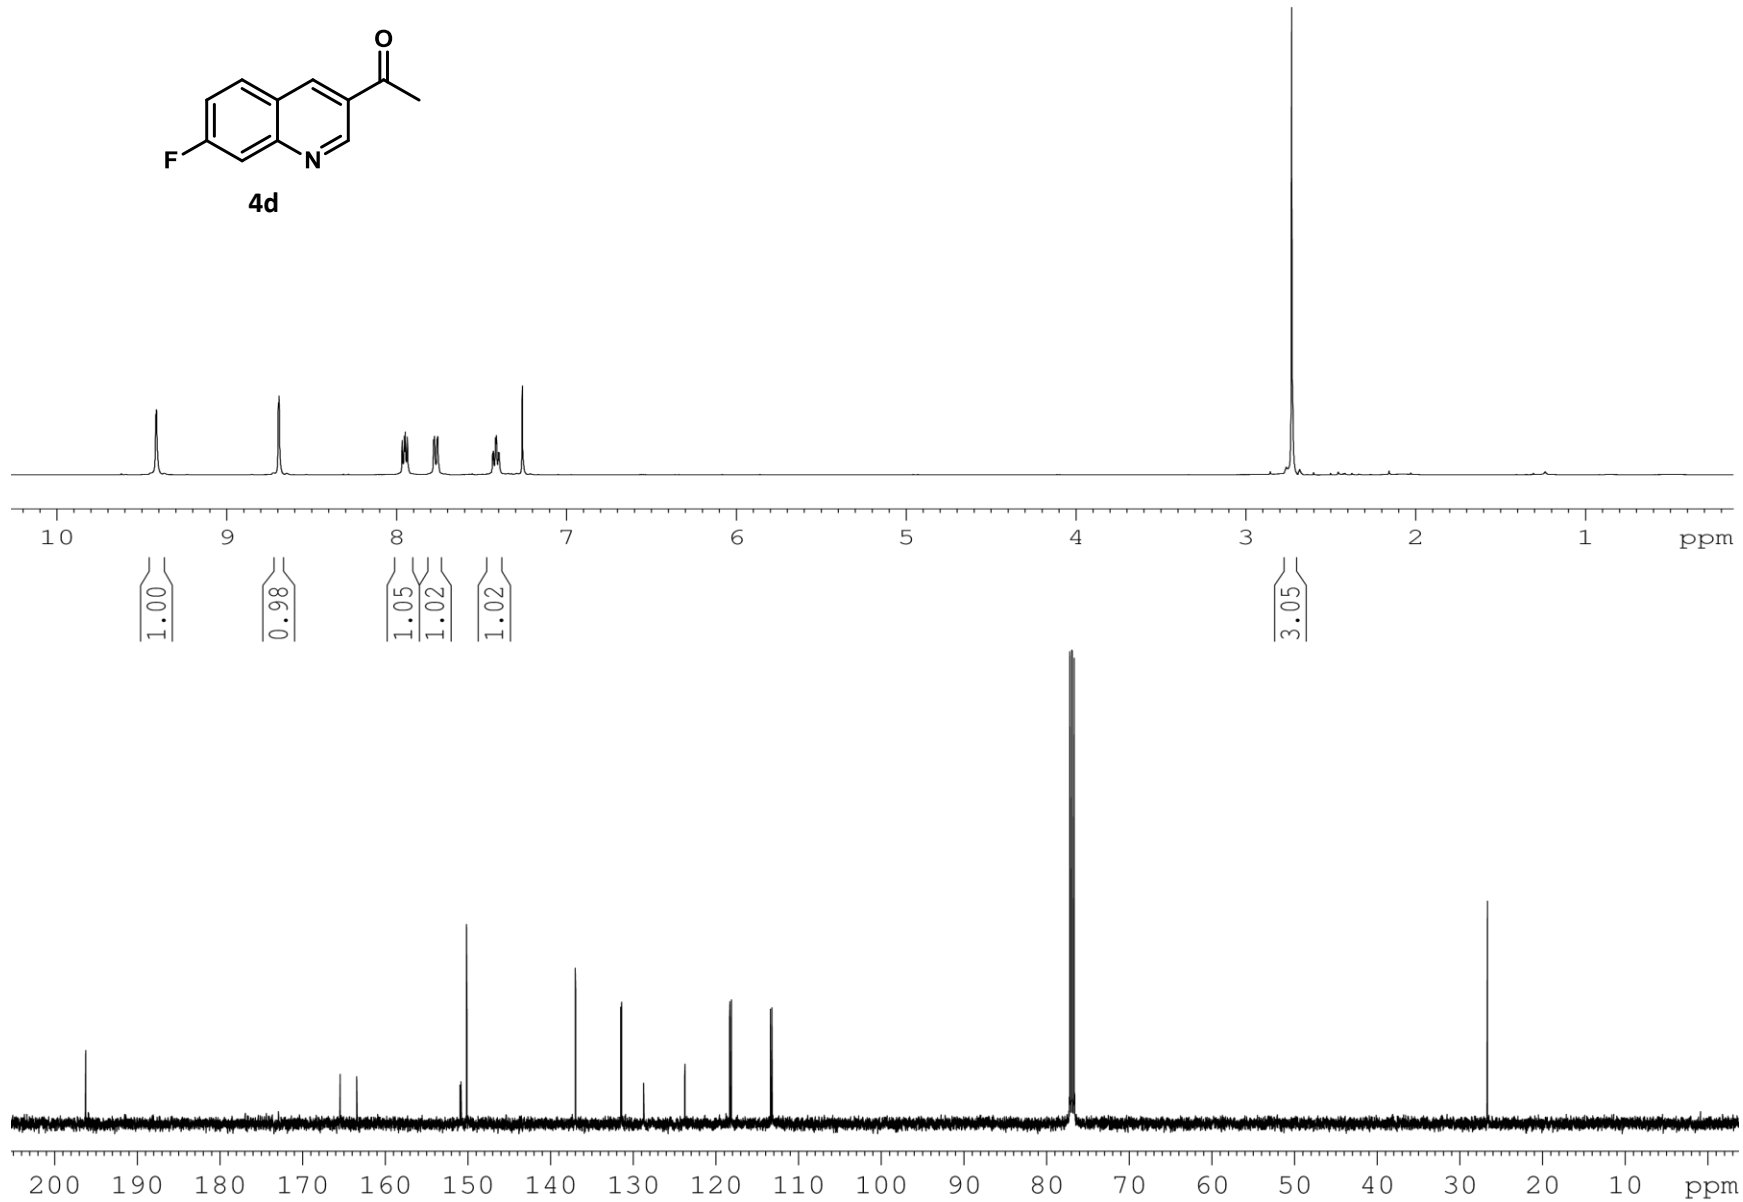

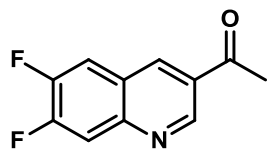

**4e**

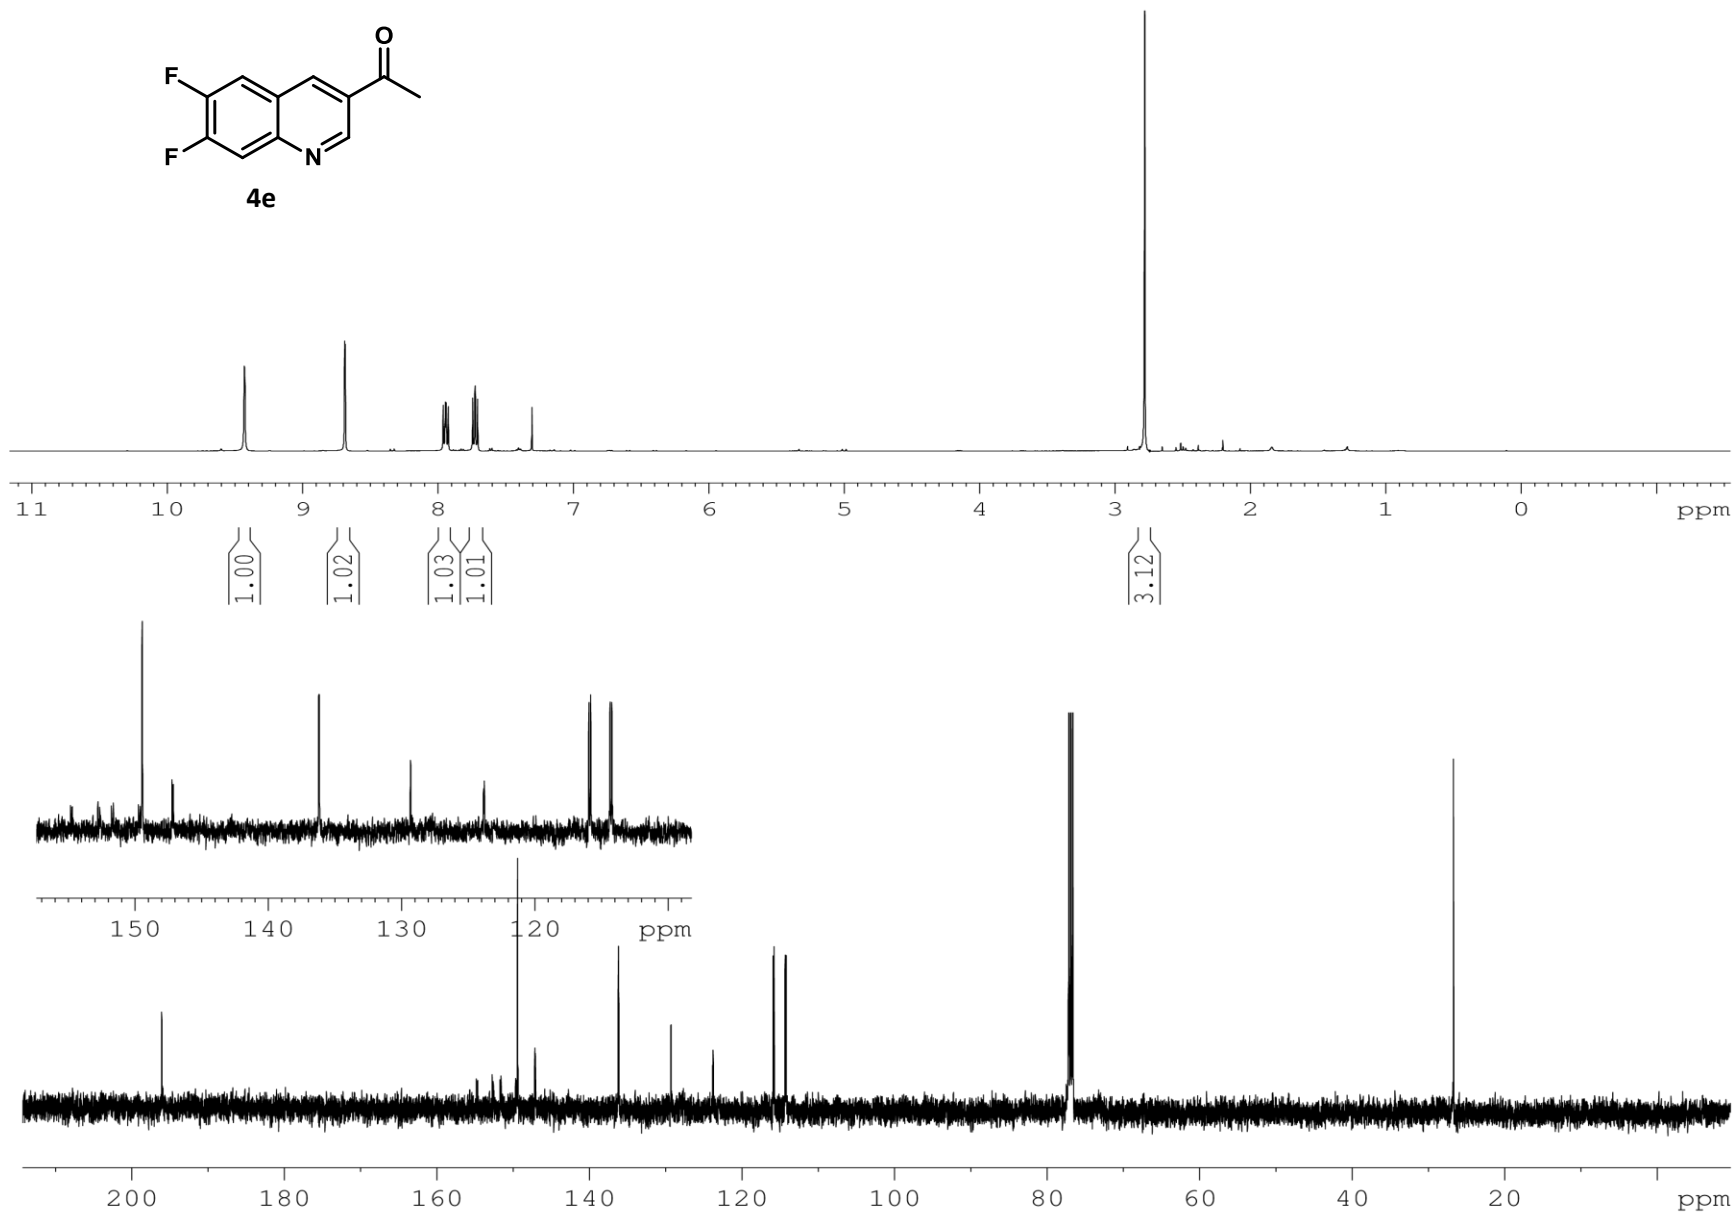

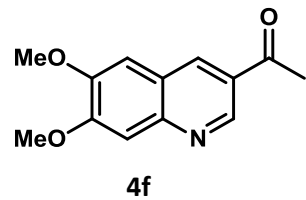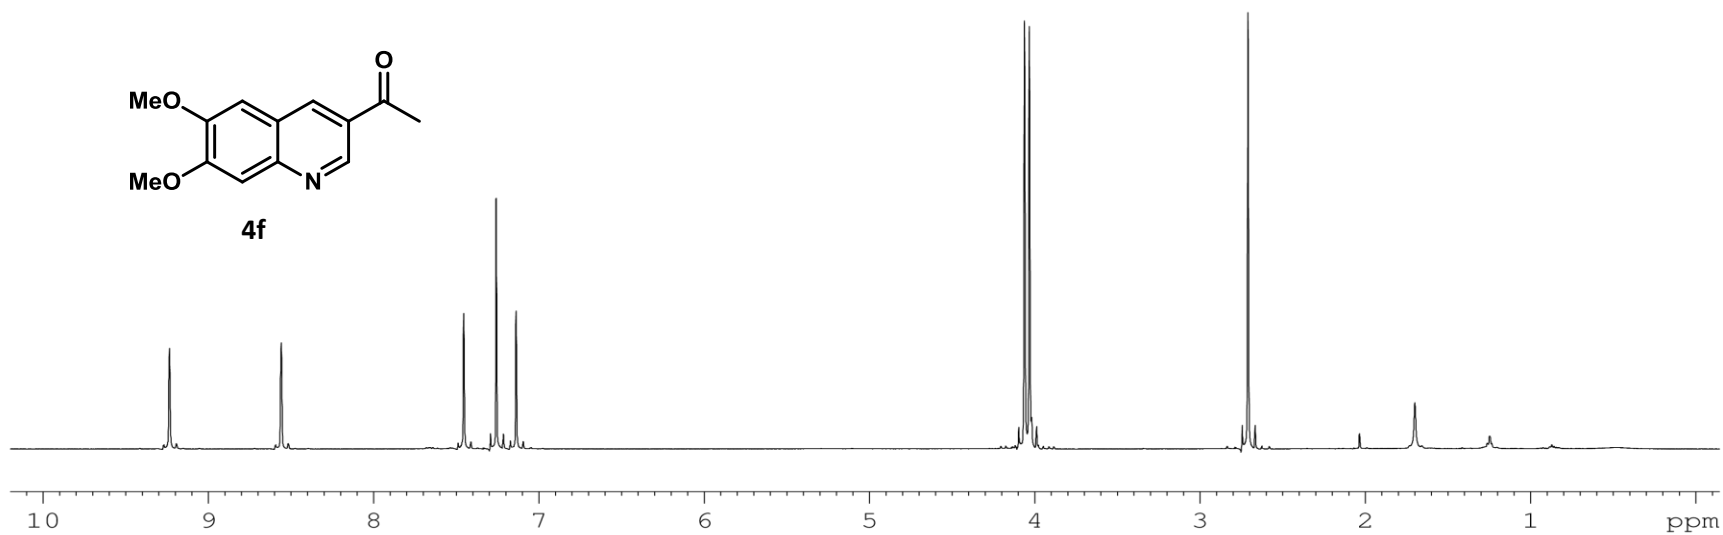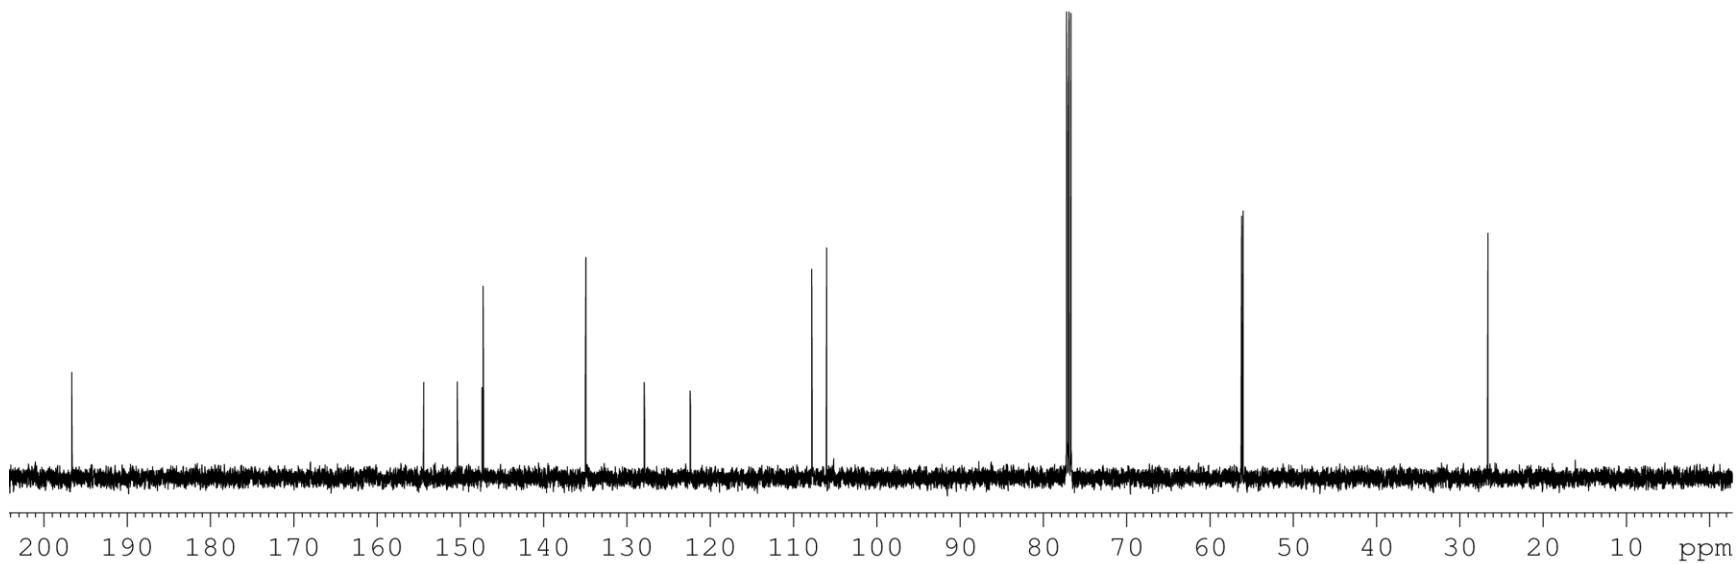



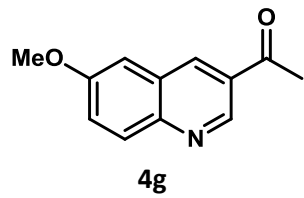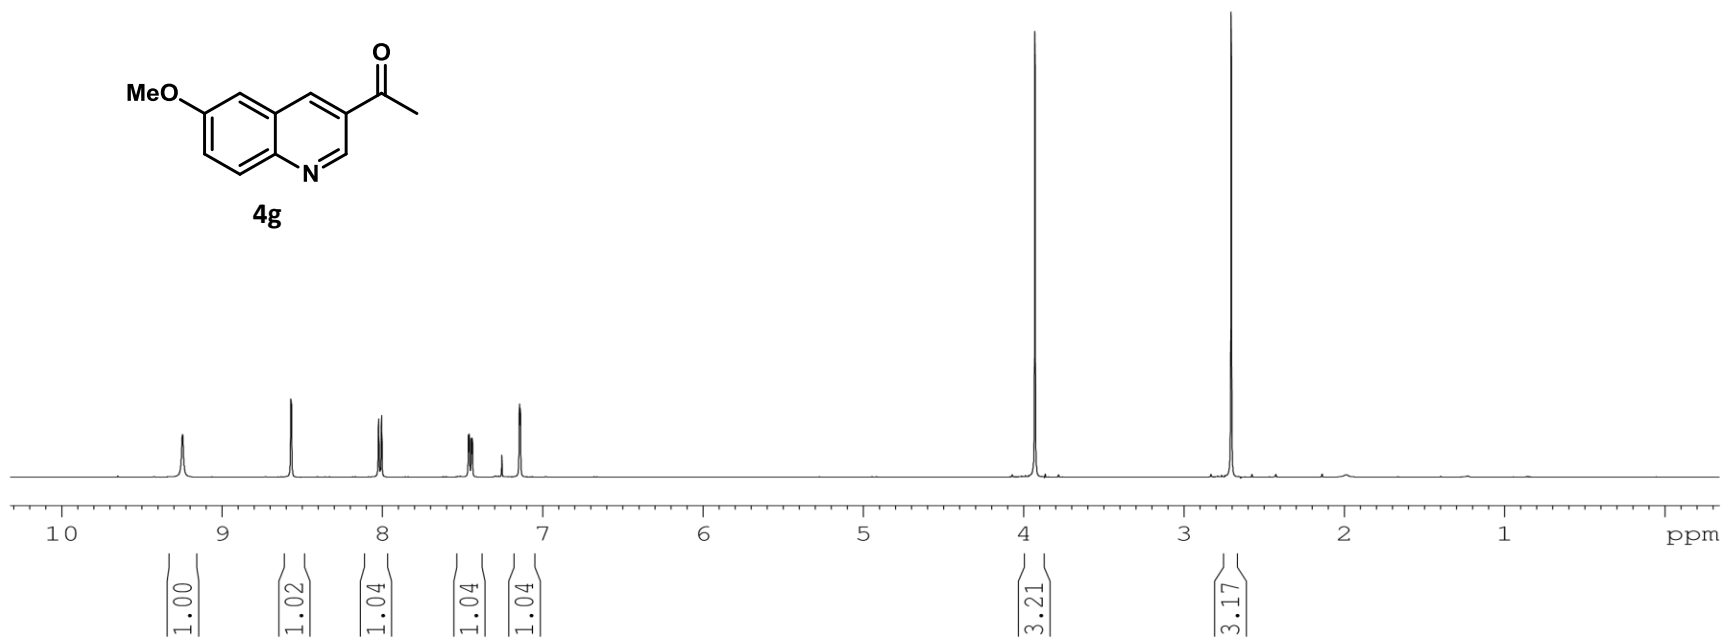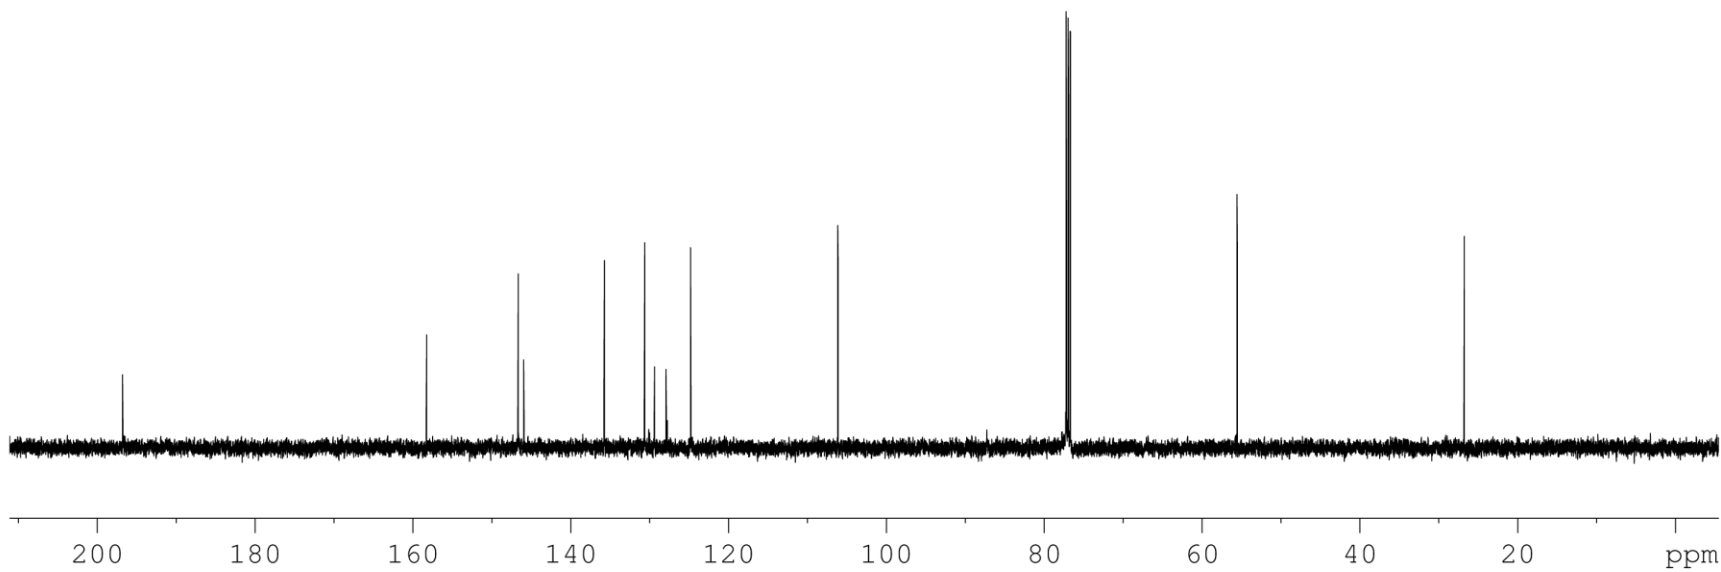

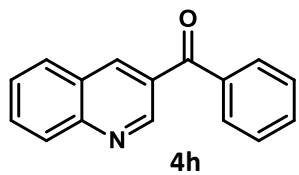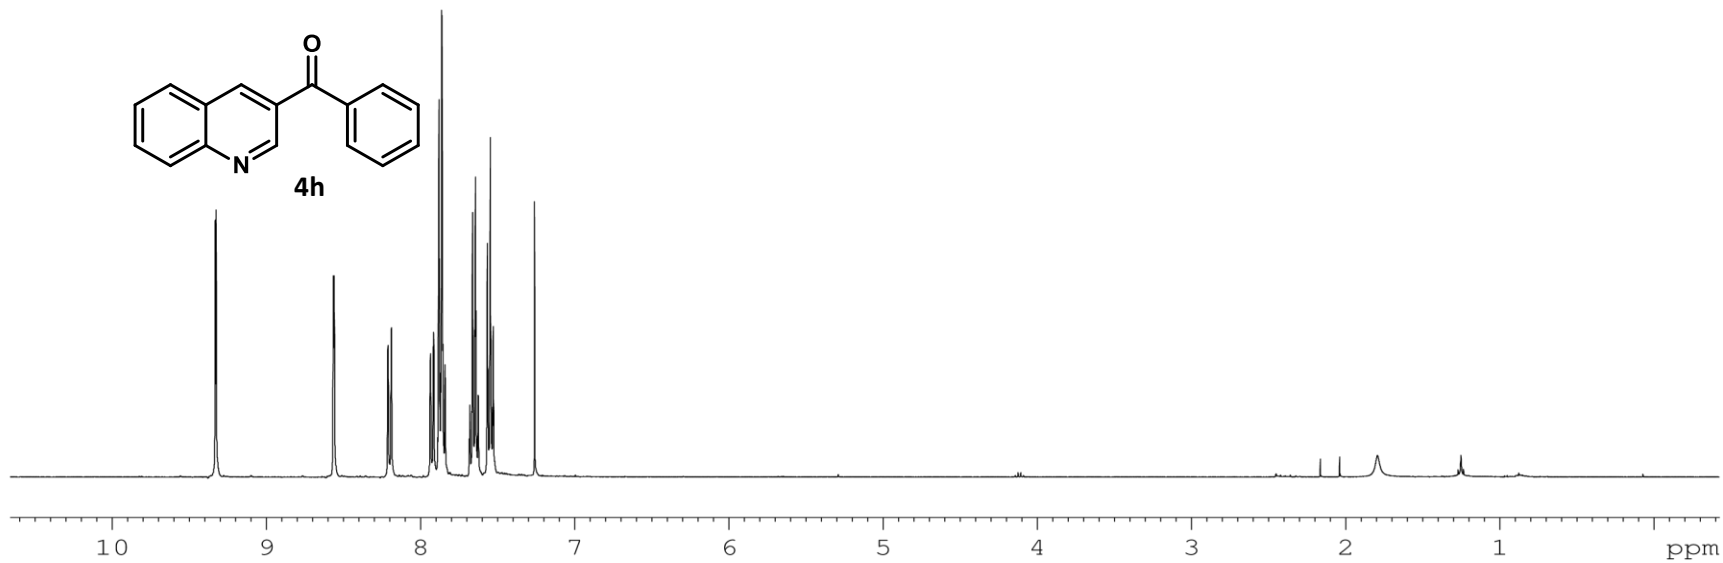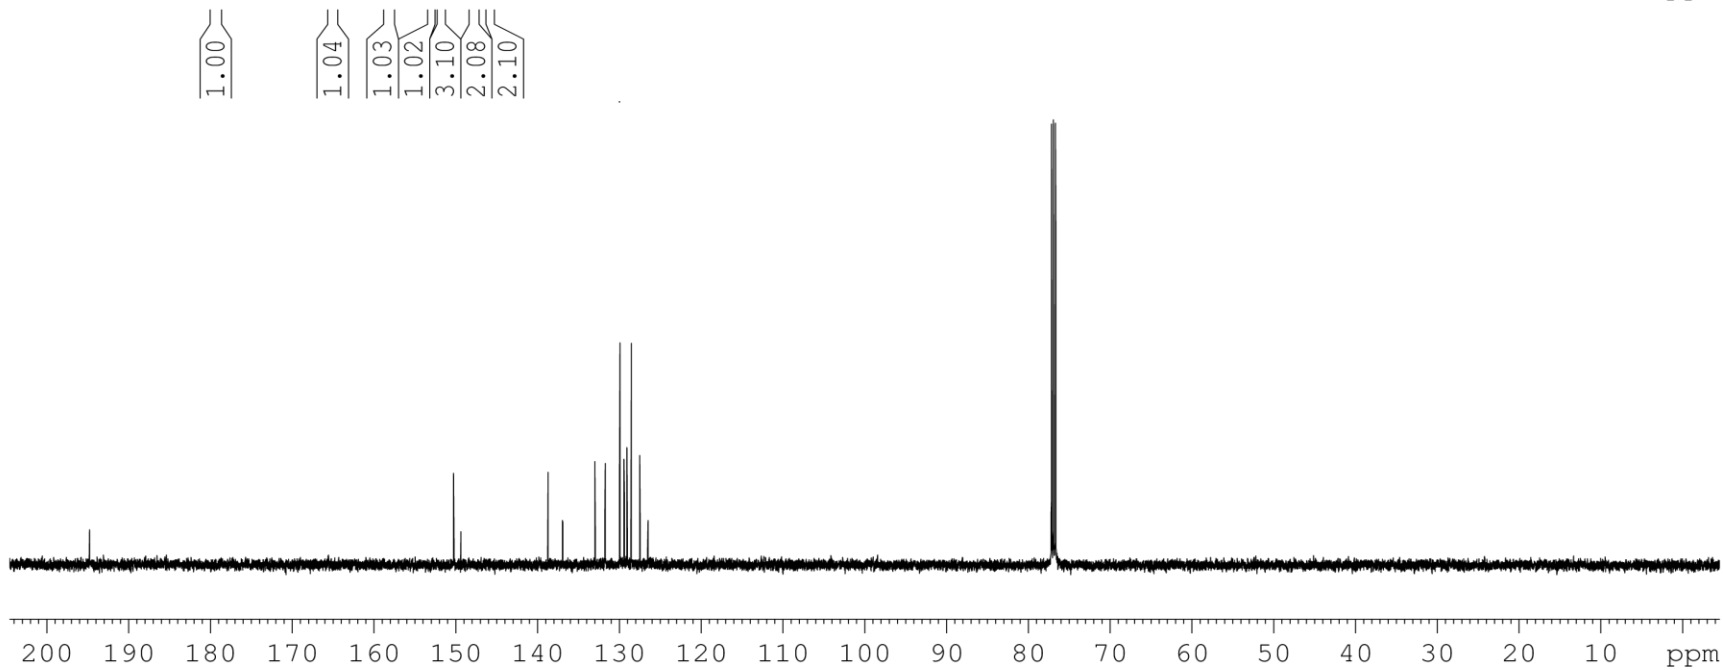

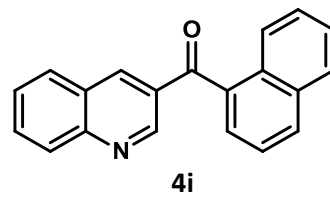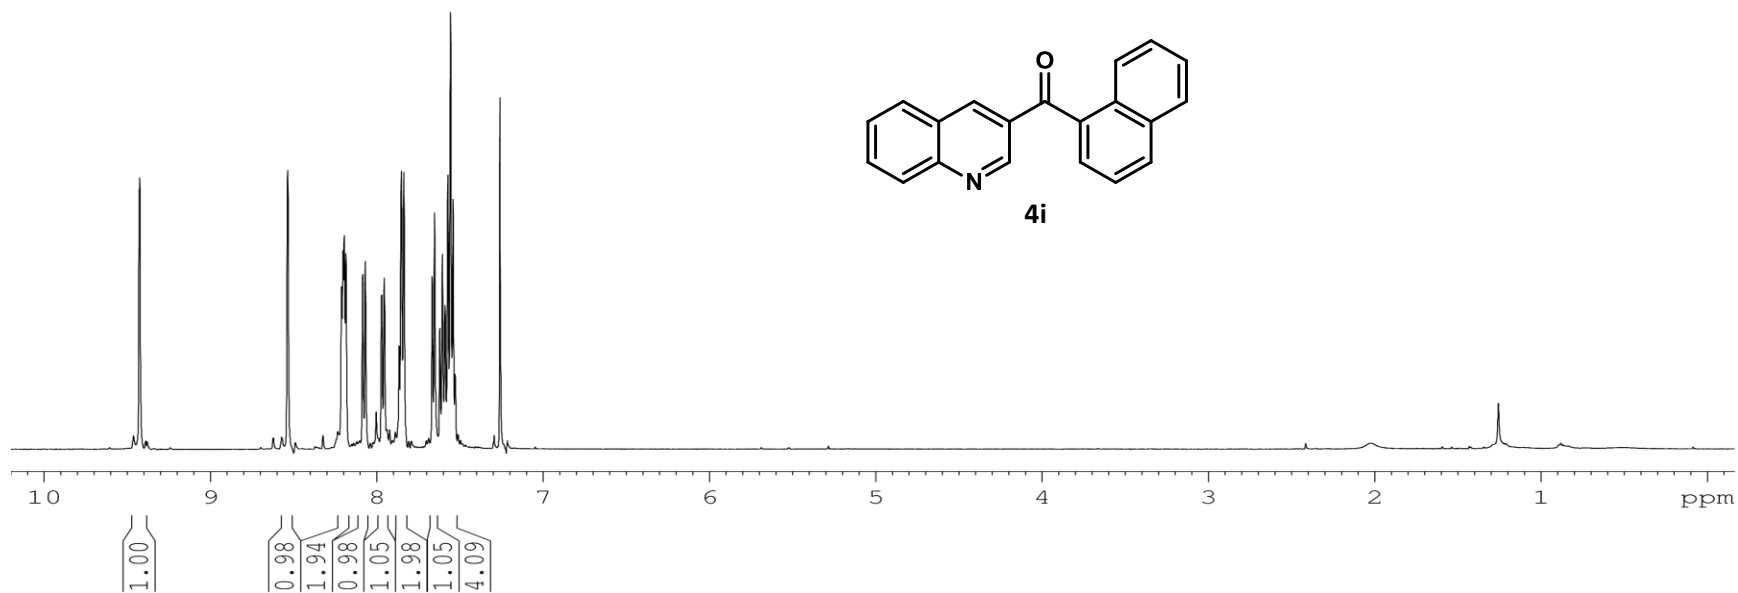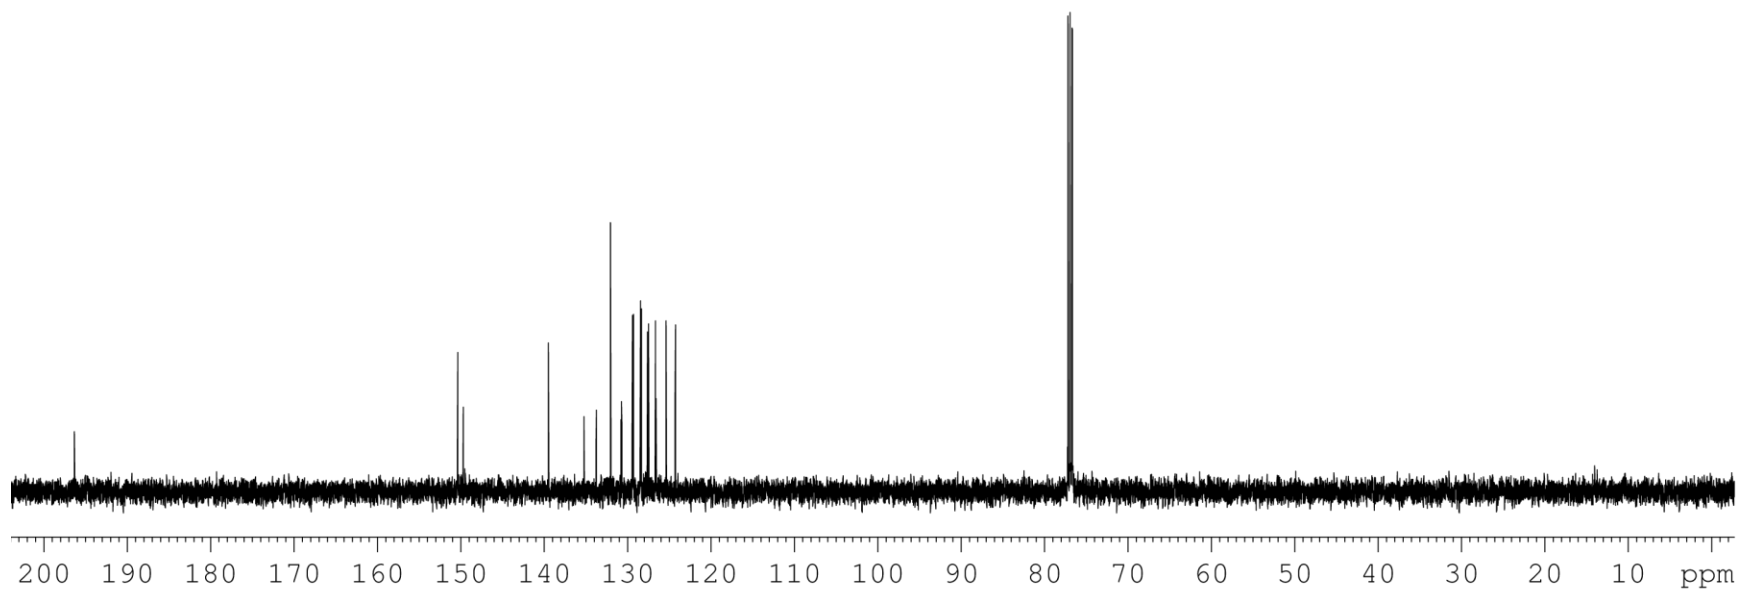

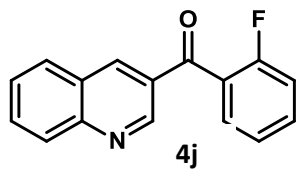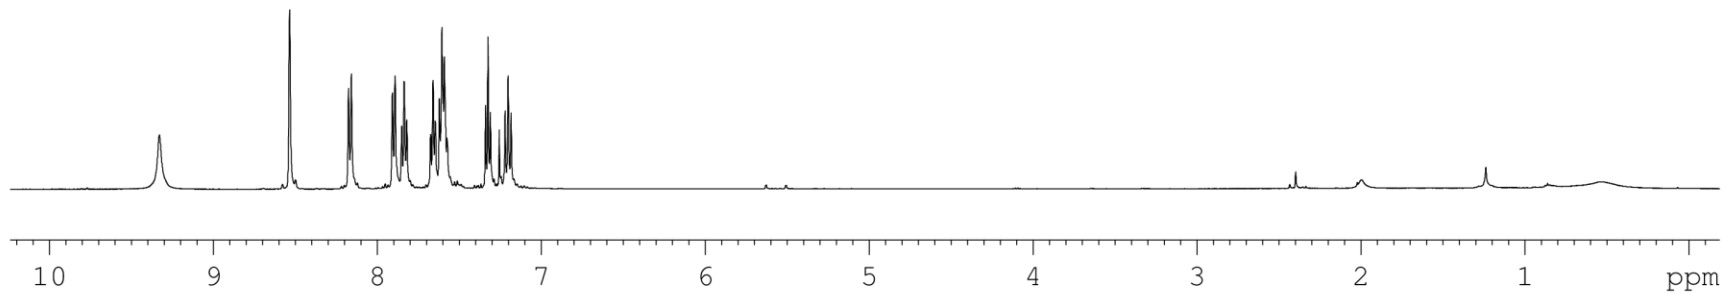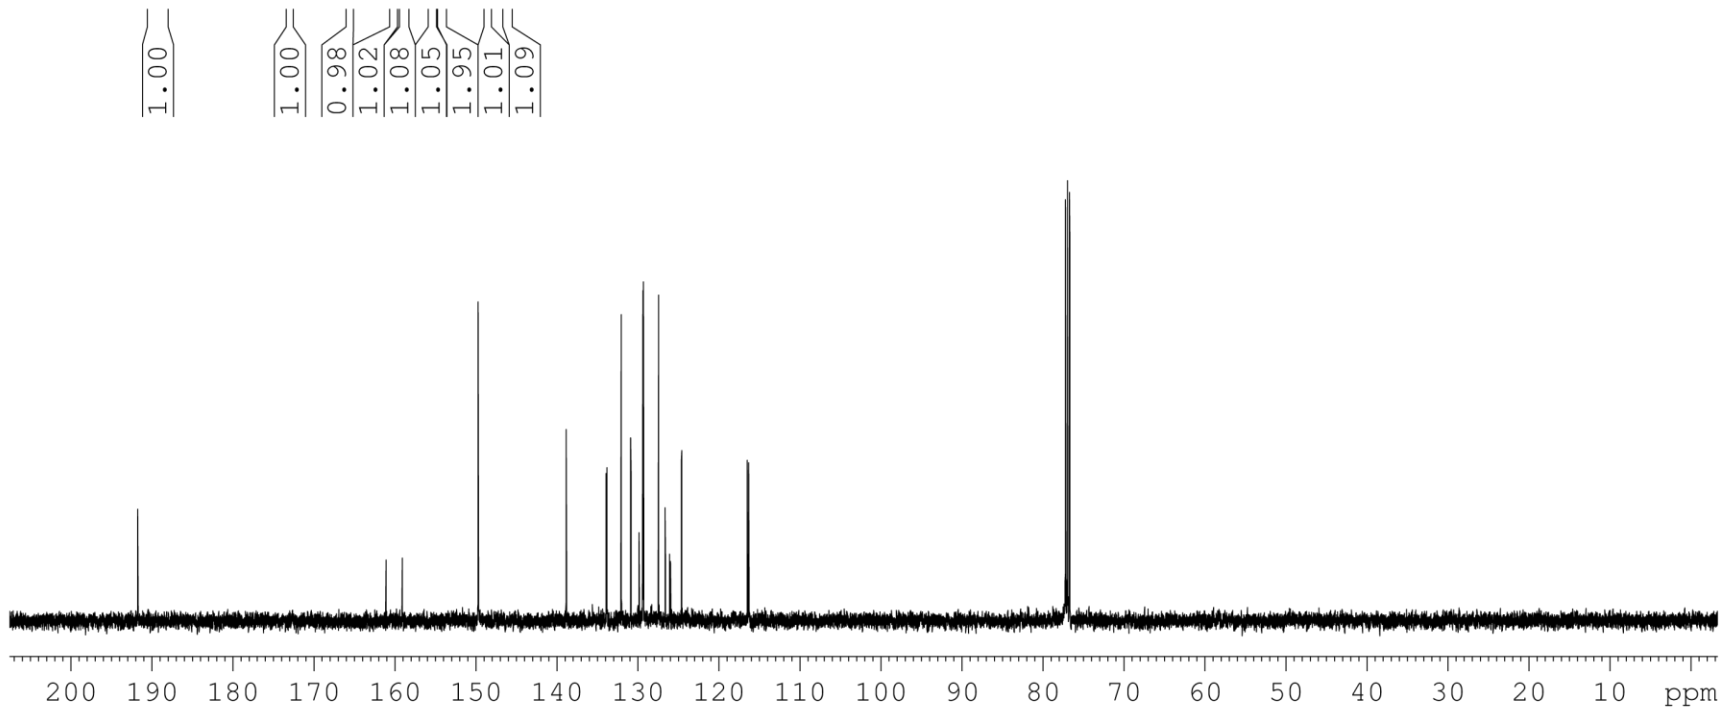

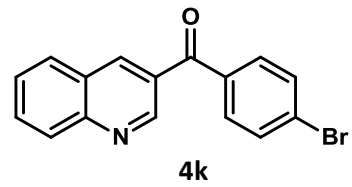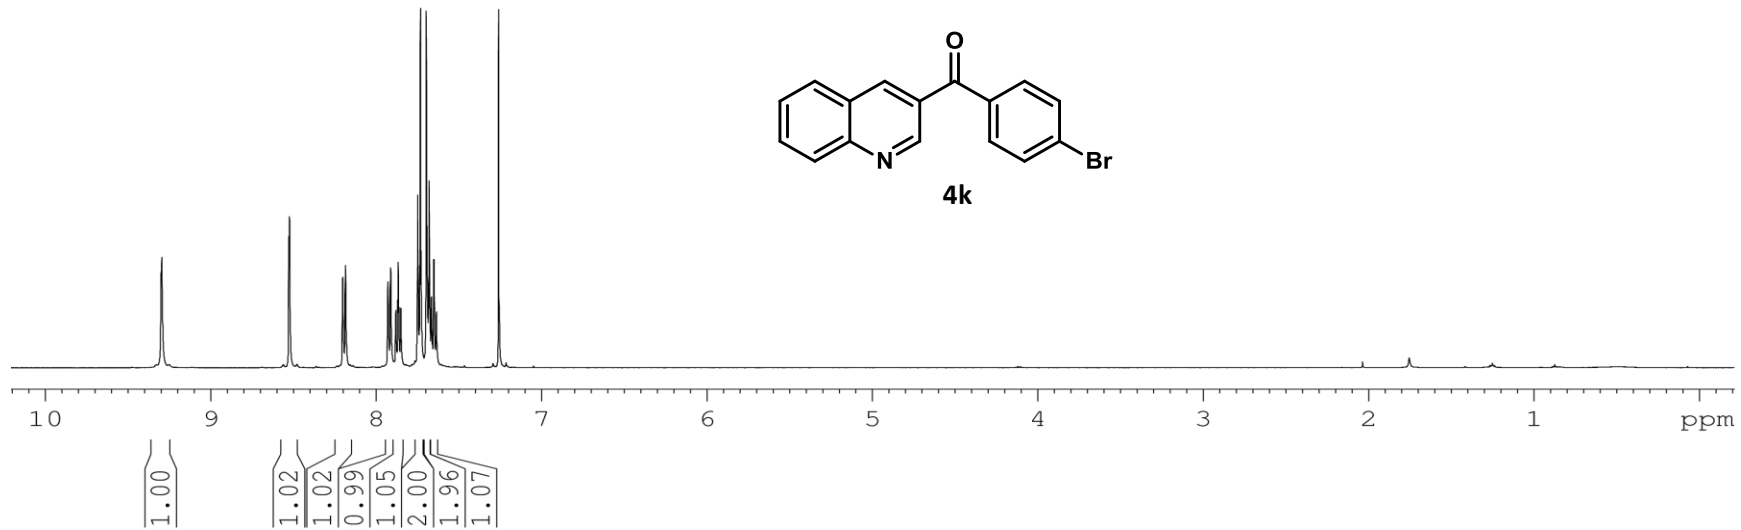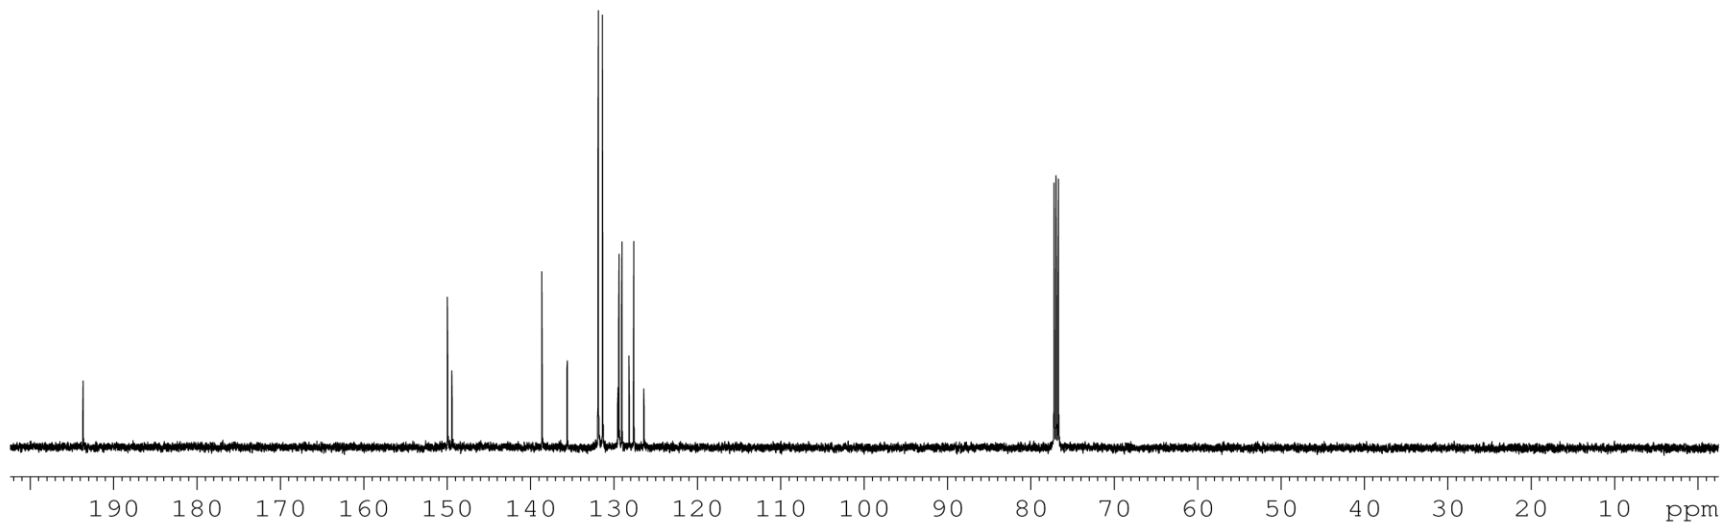

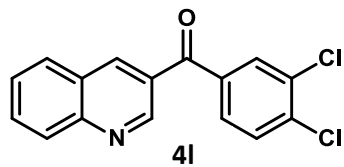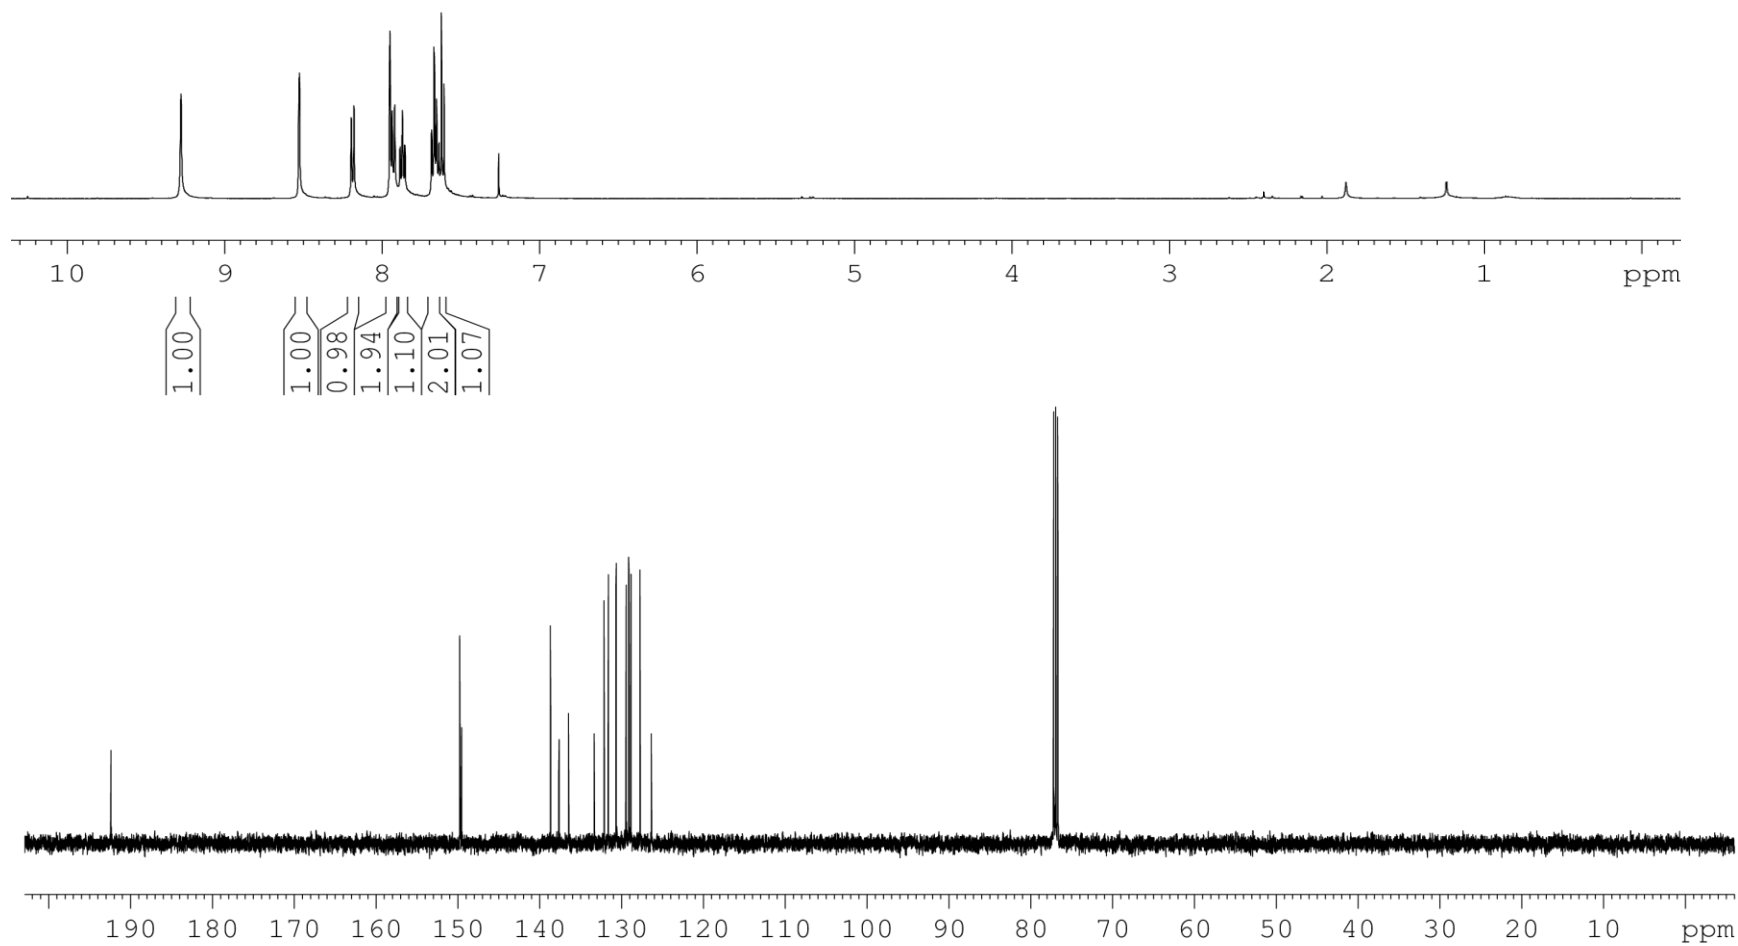

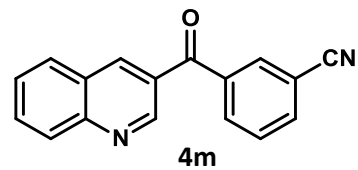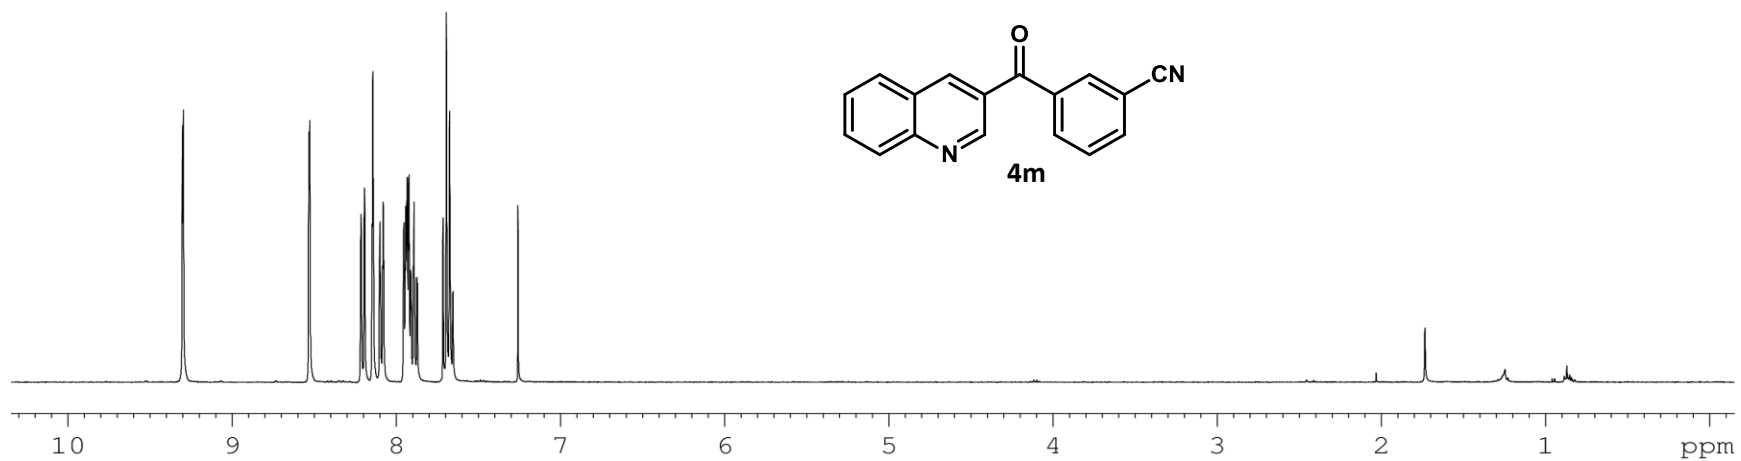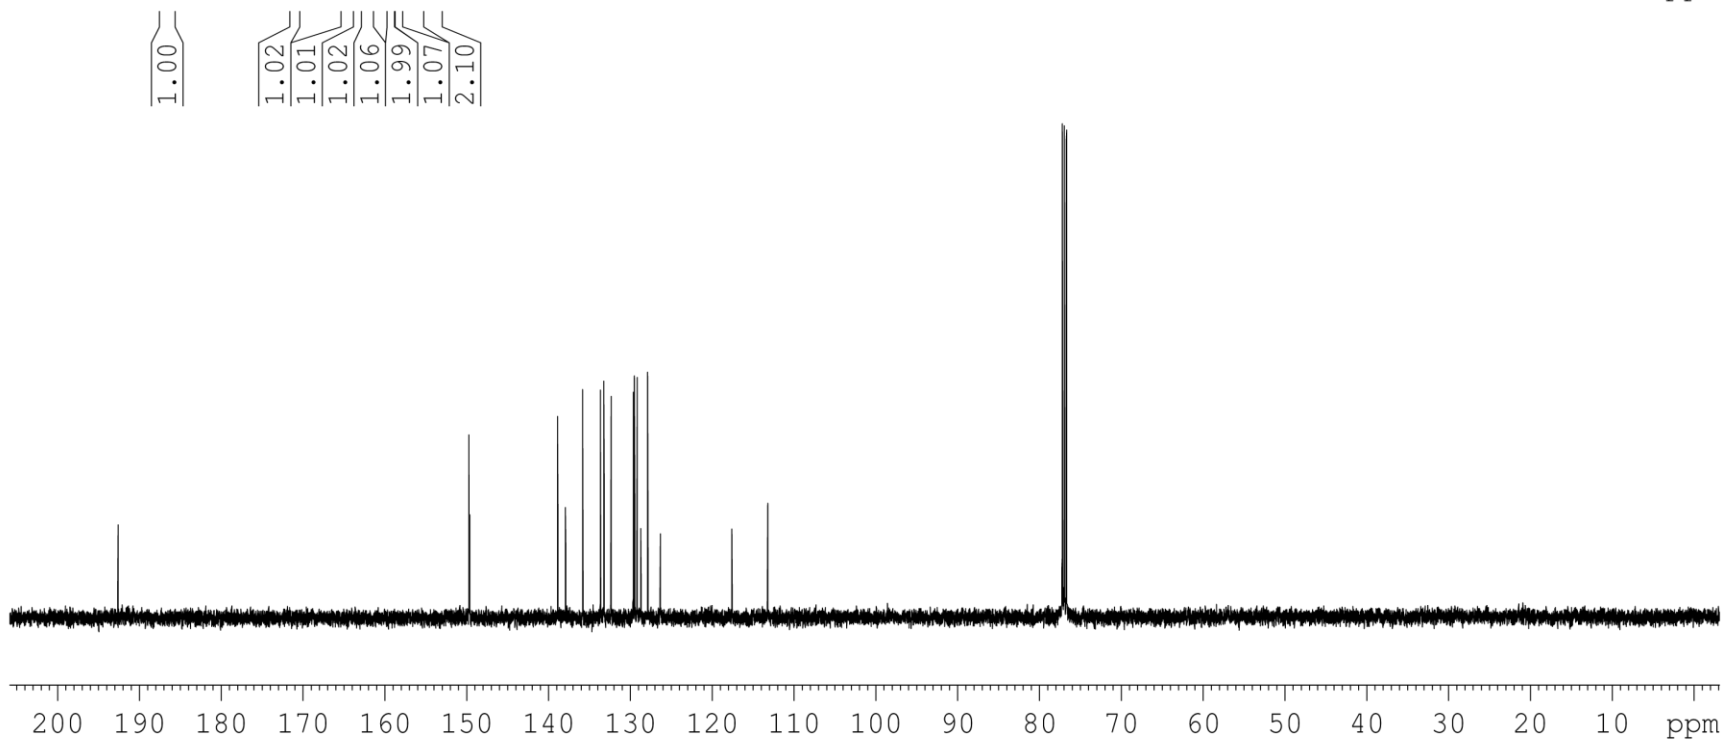

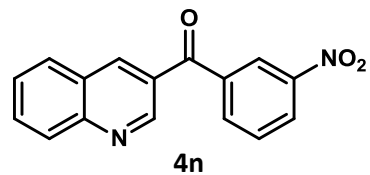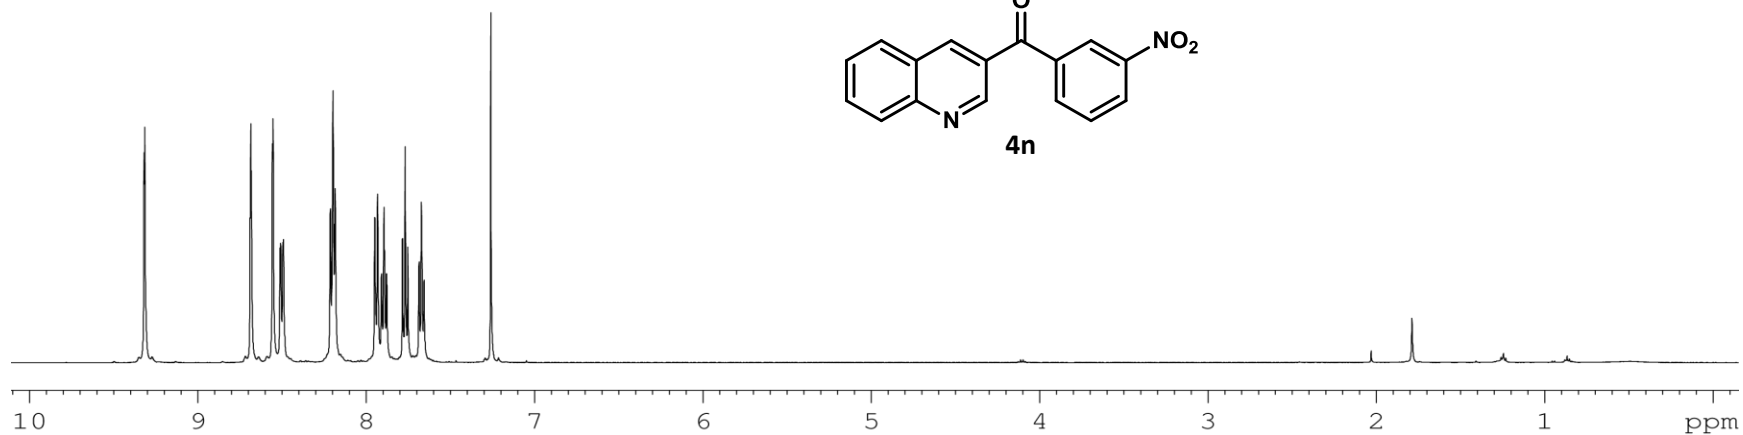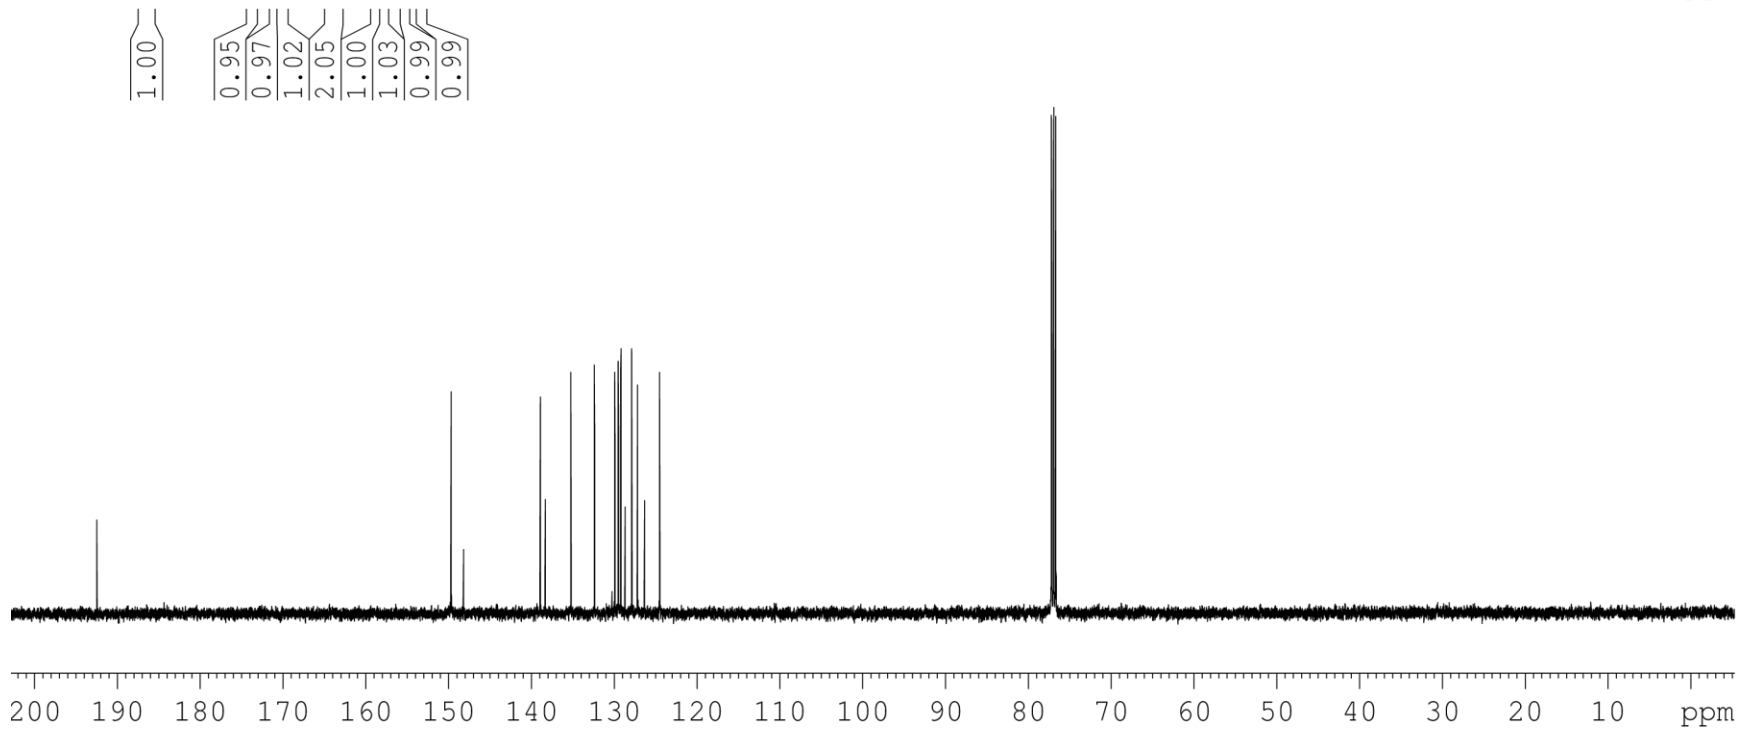



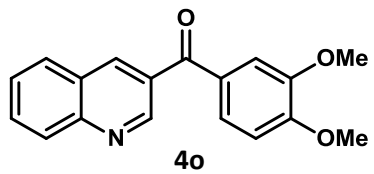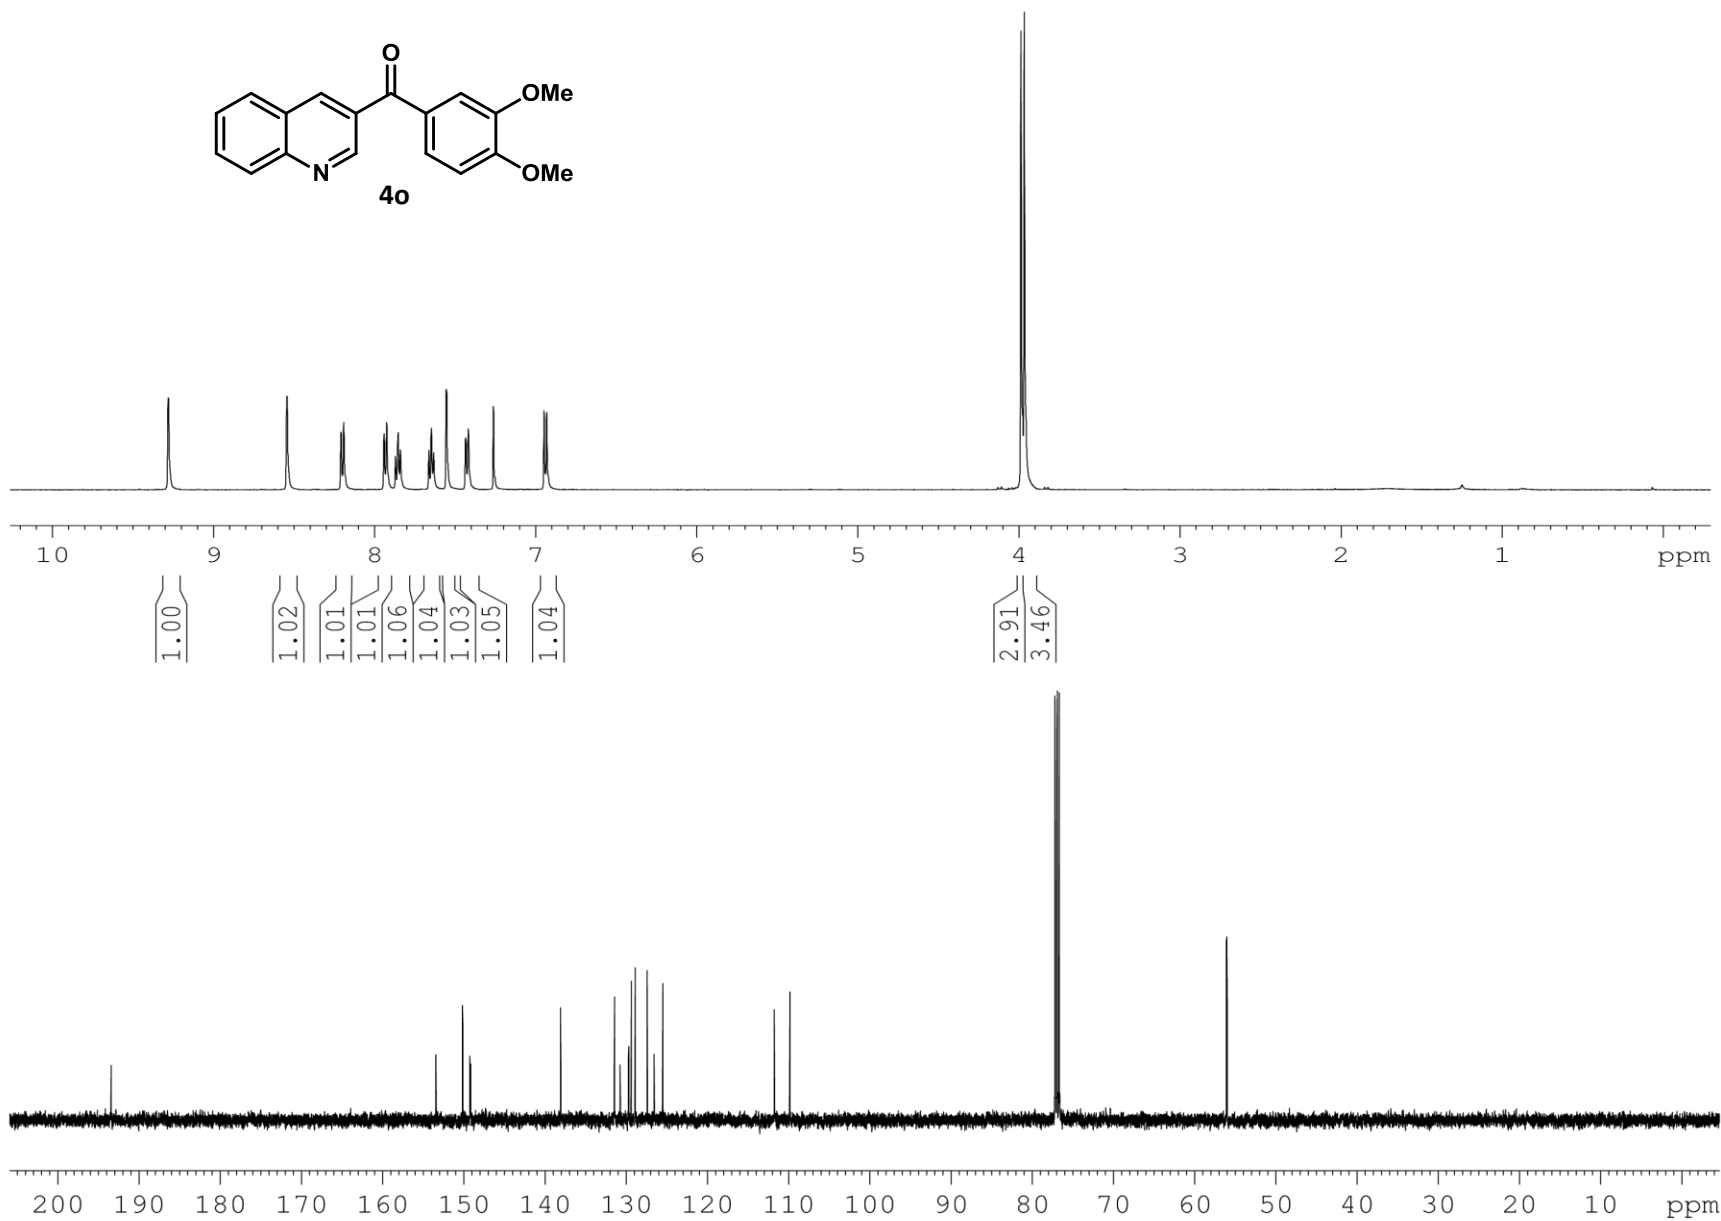

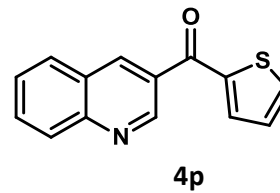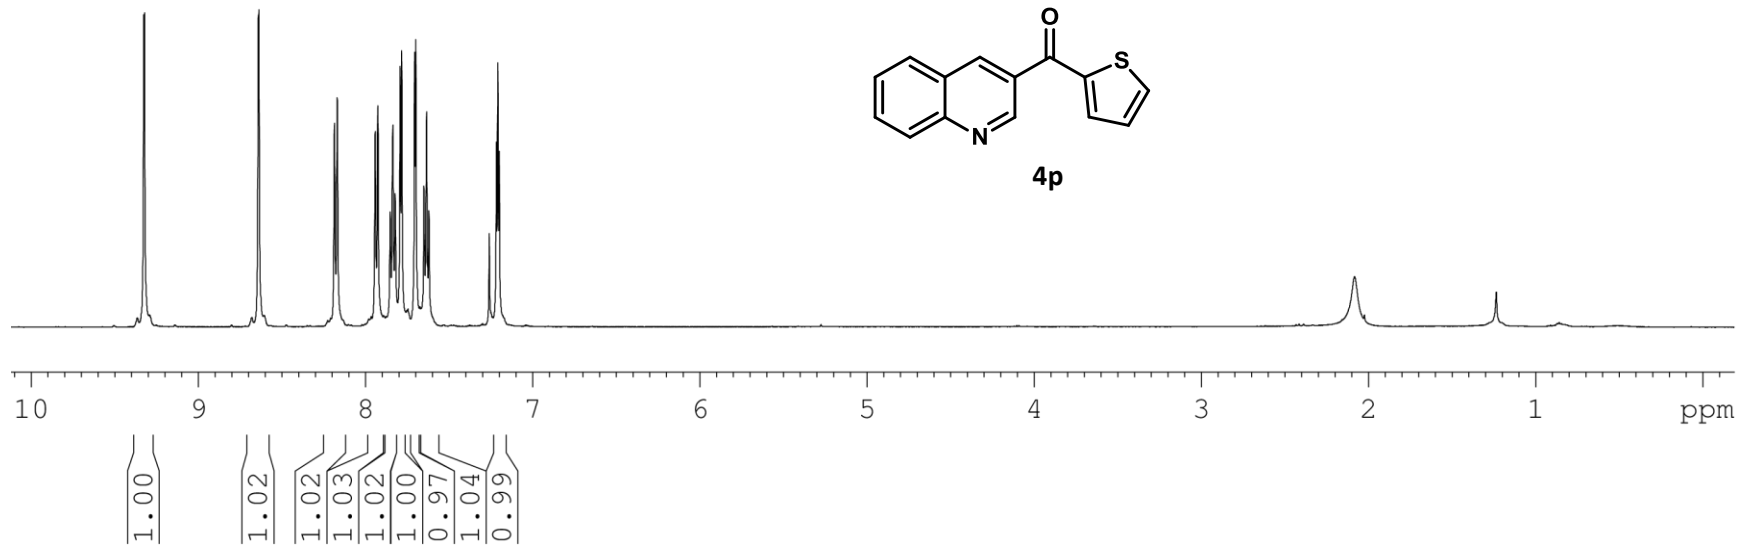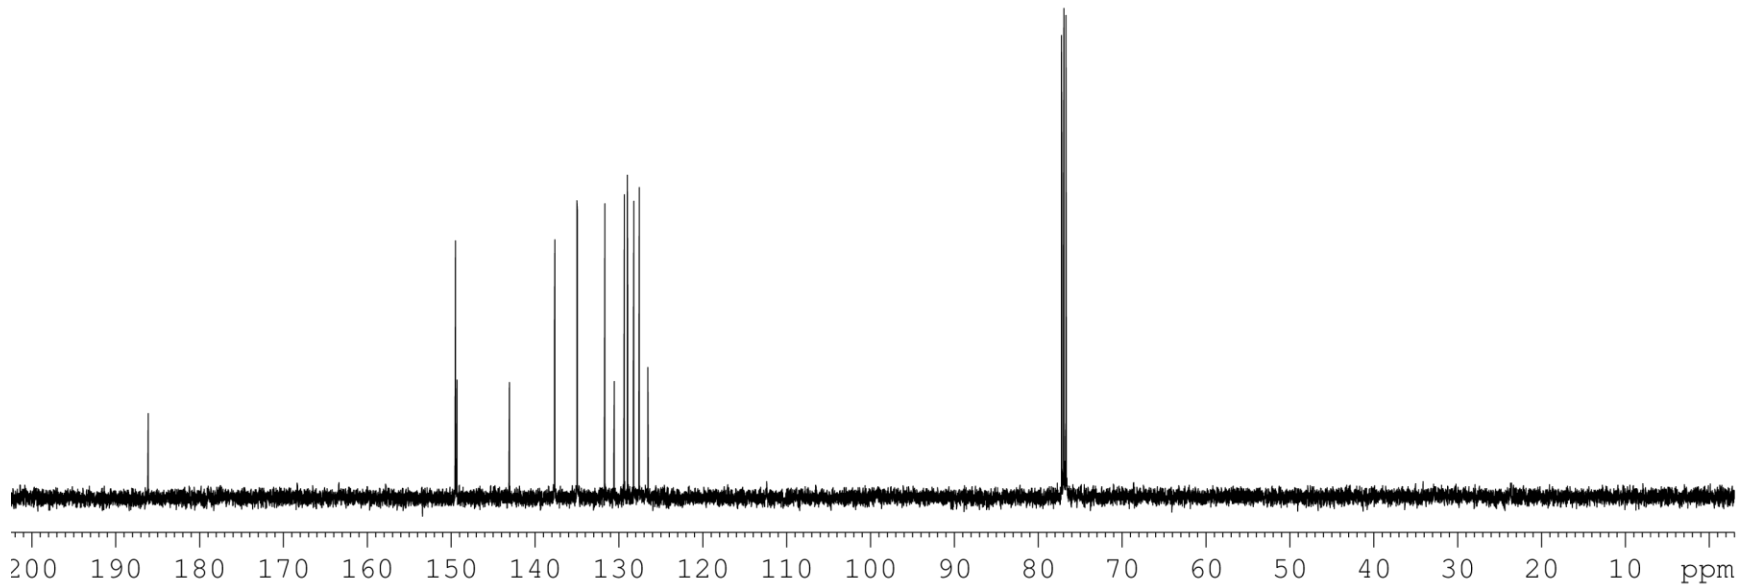

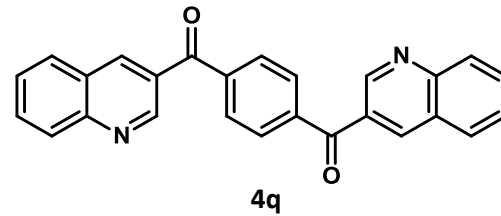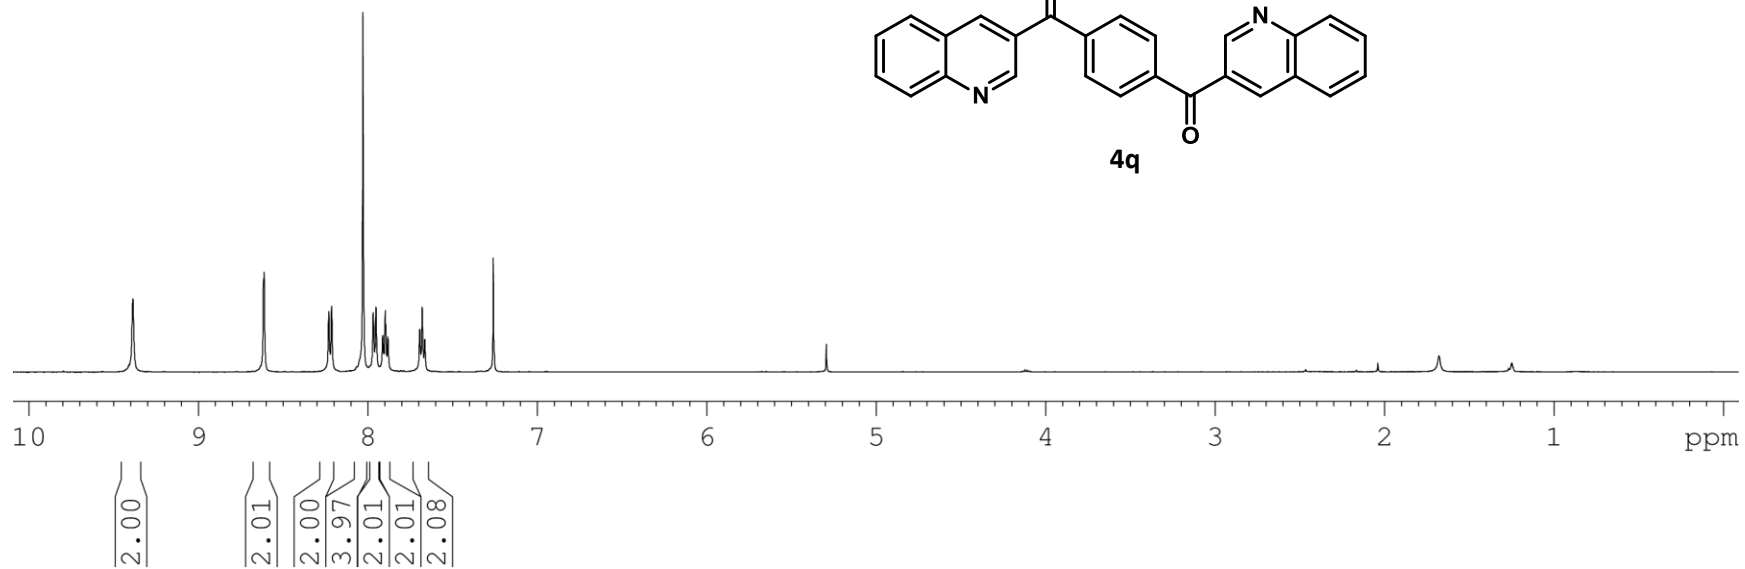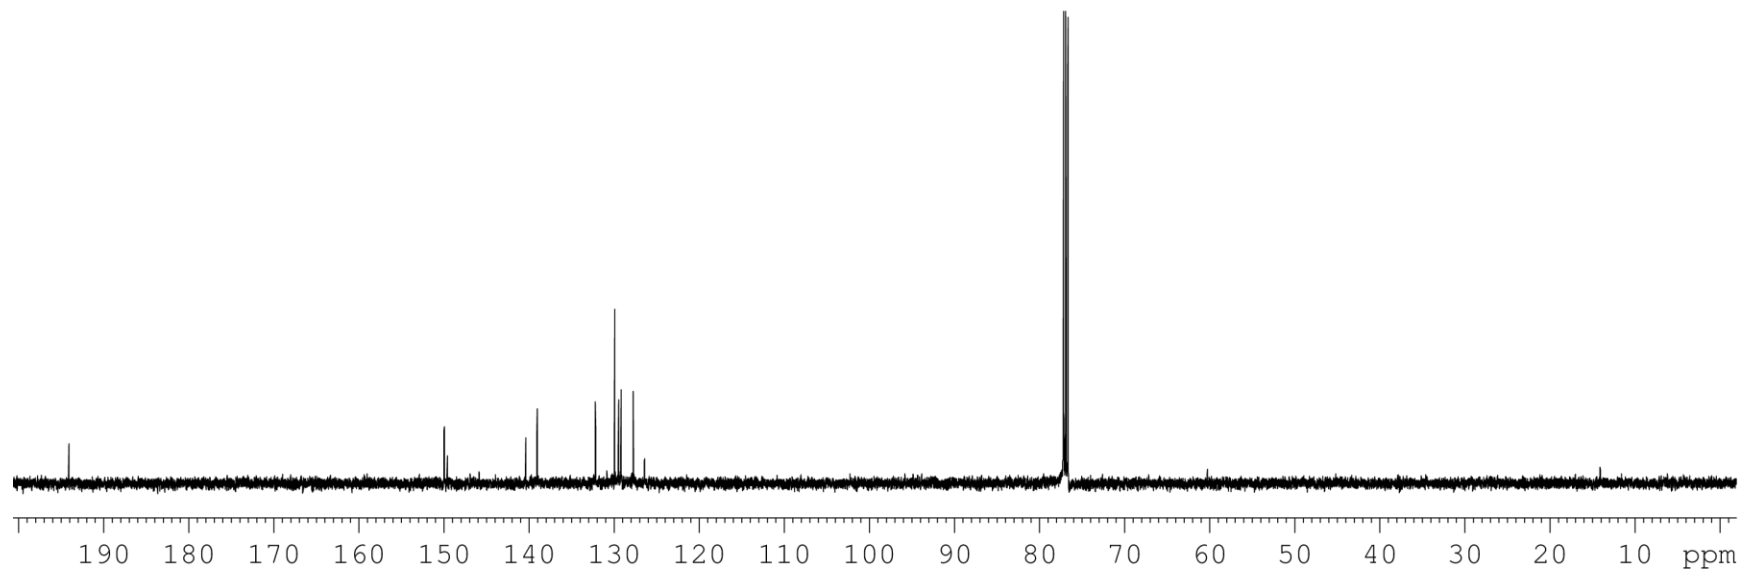

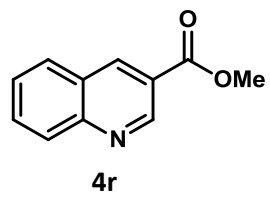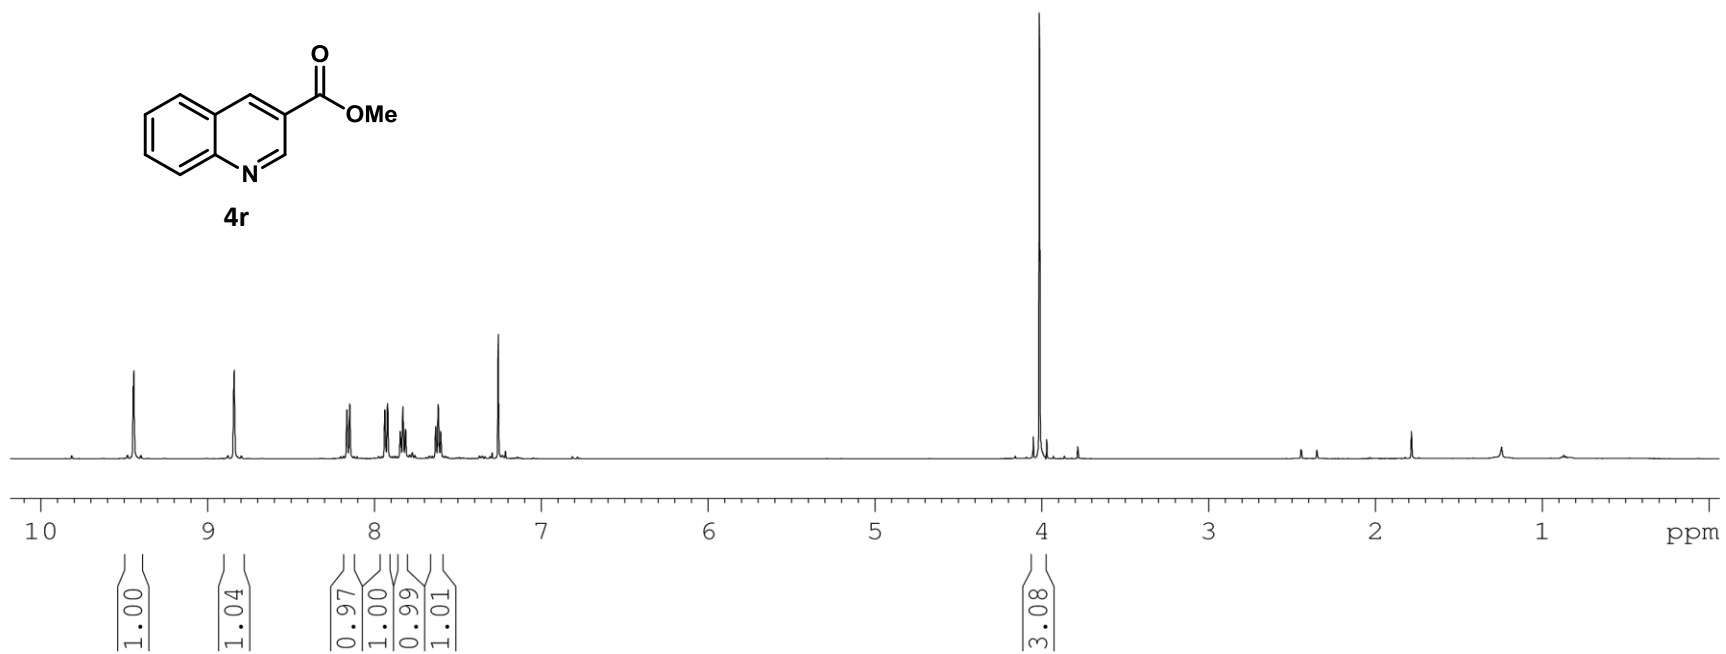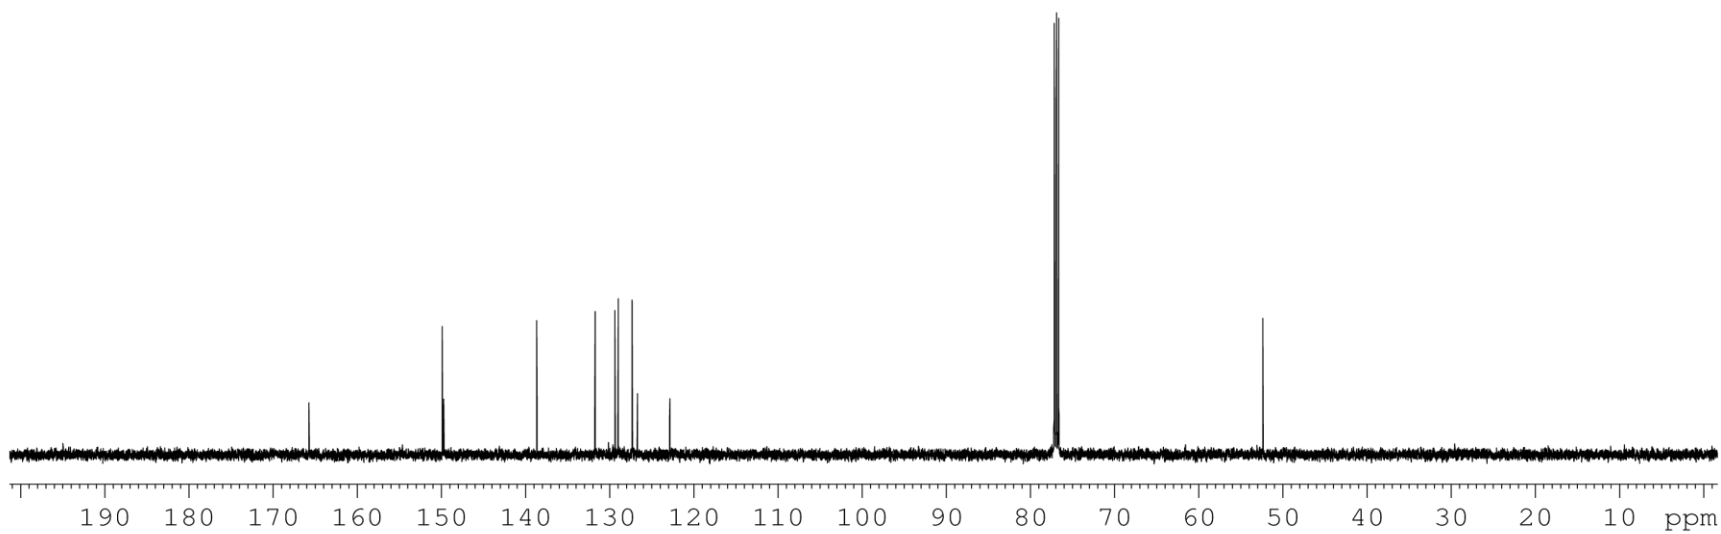

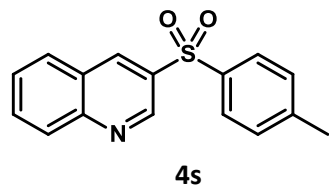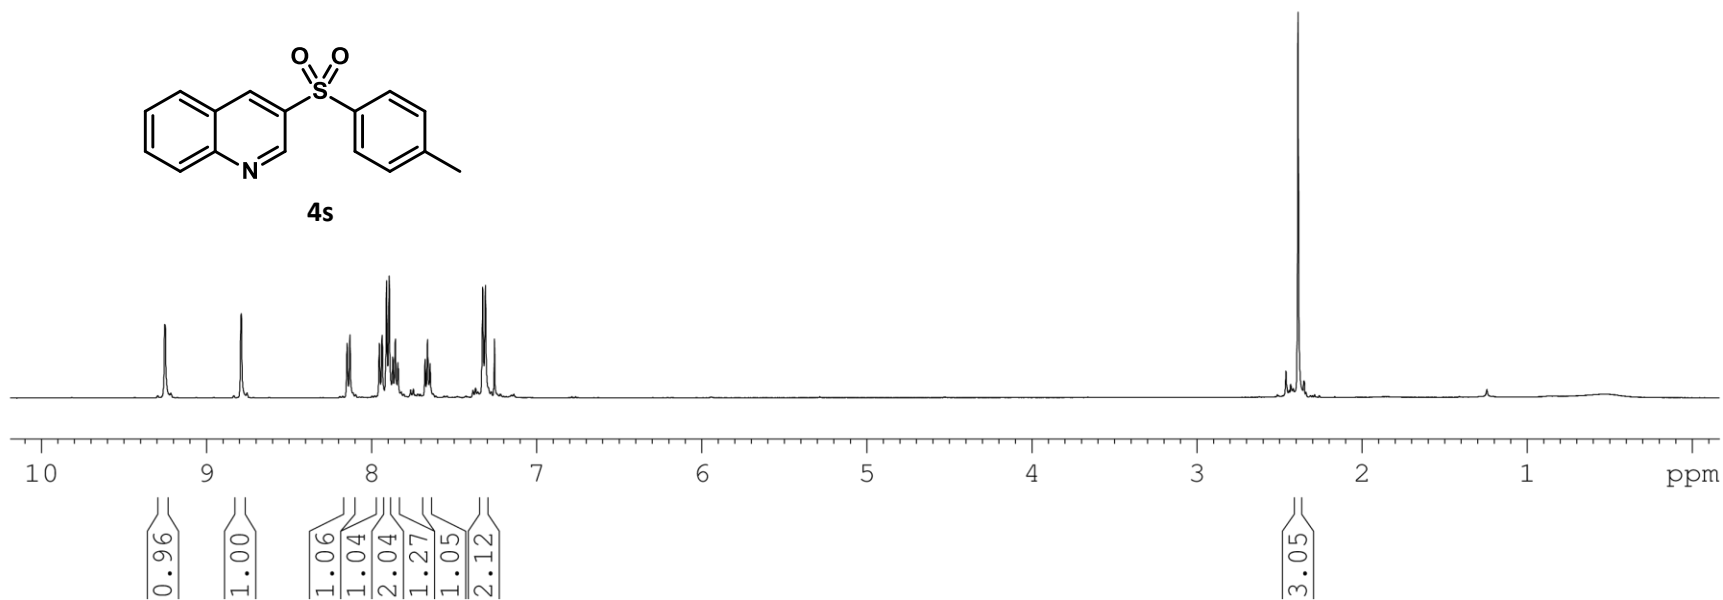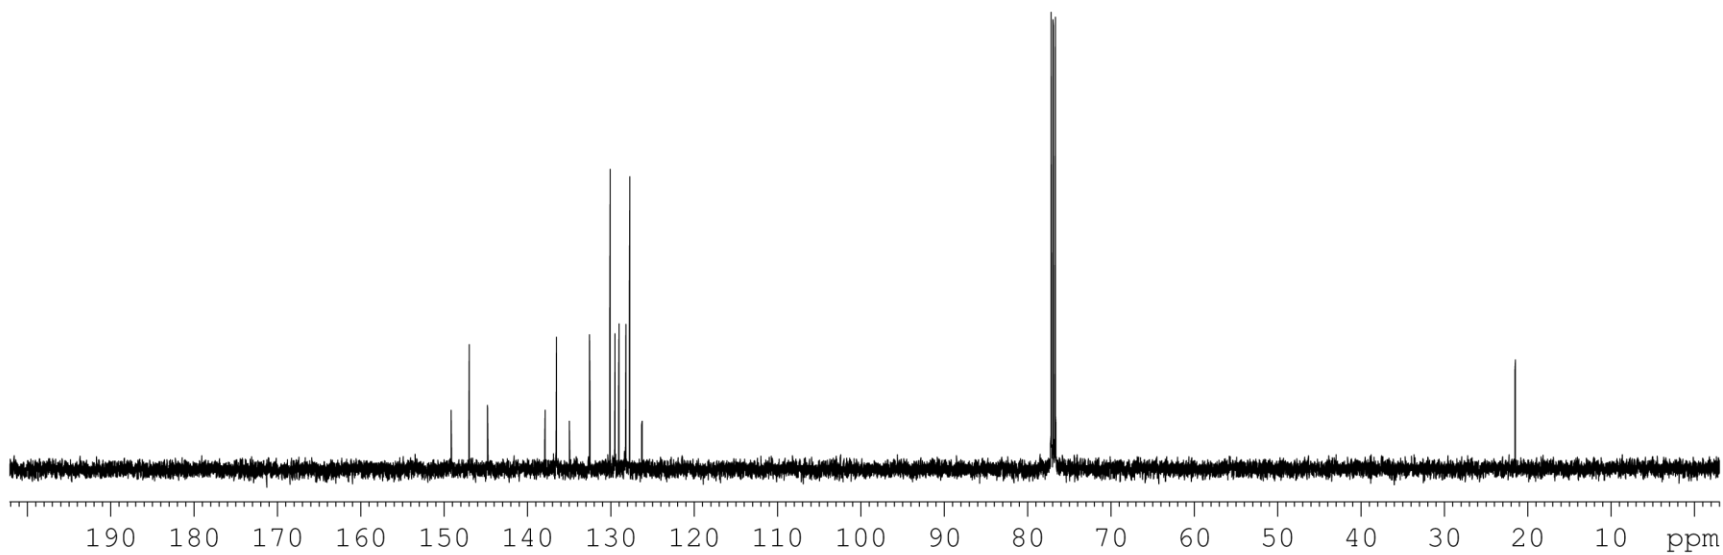

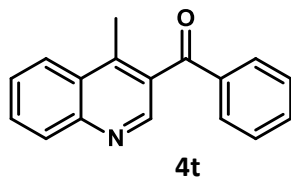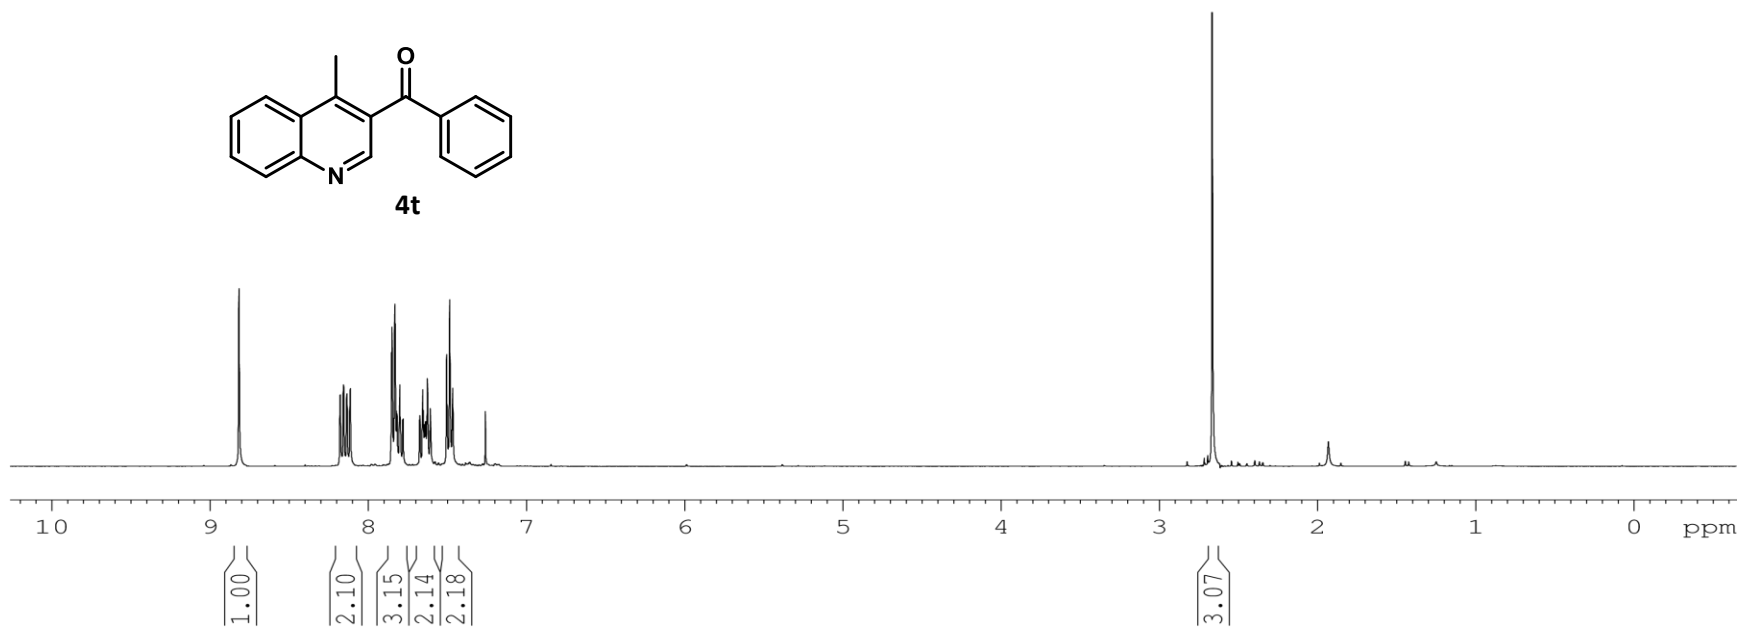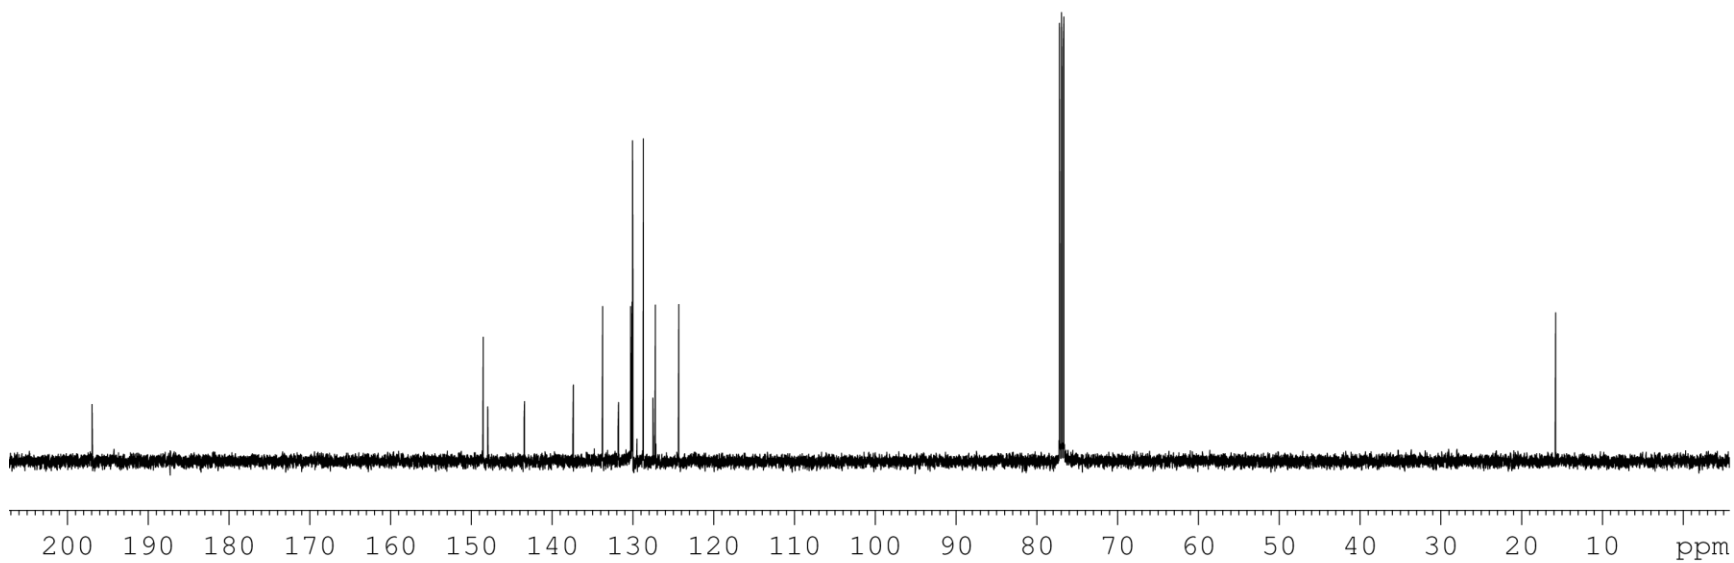

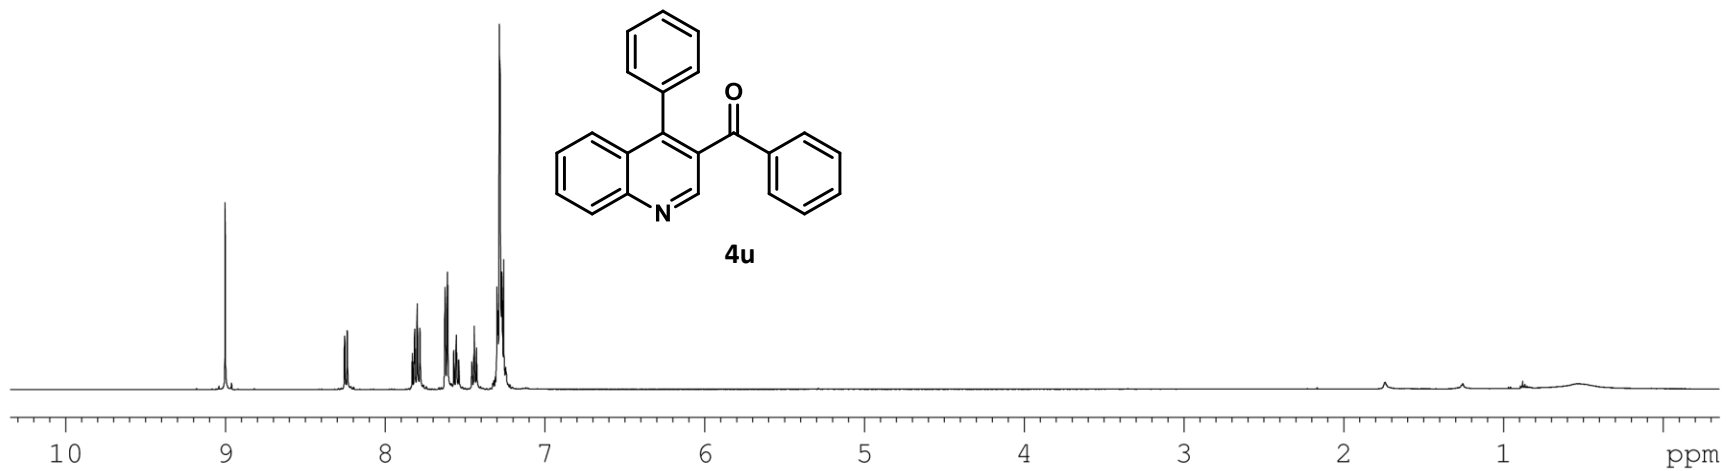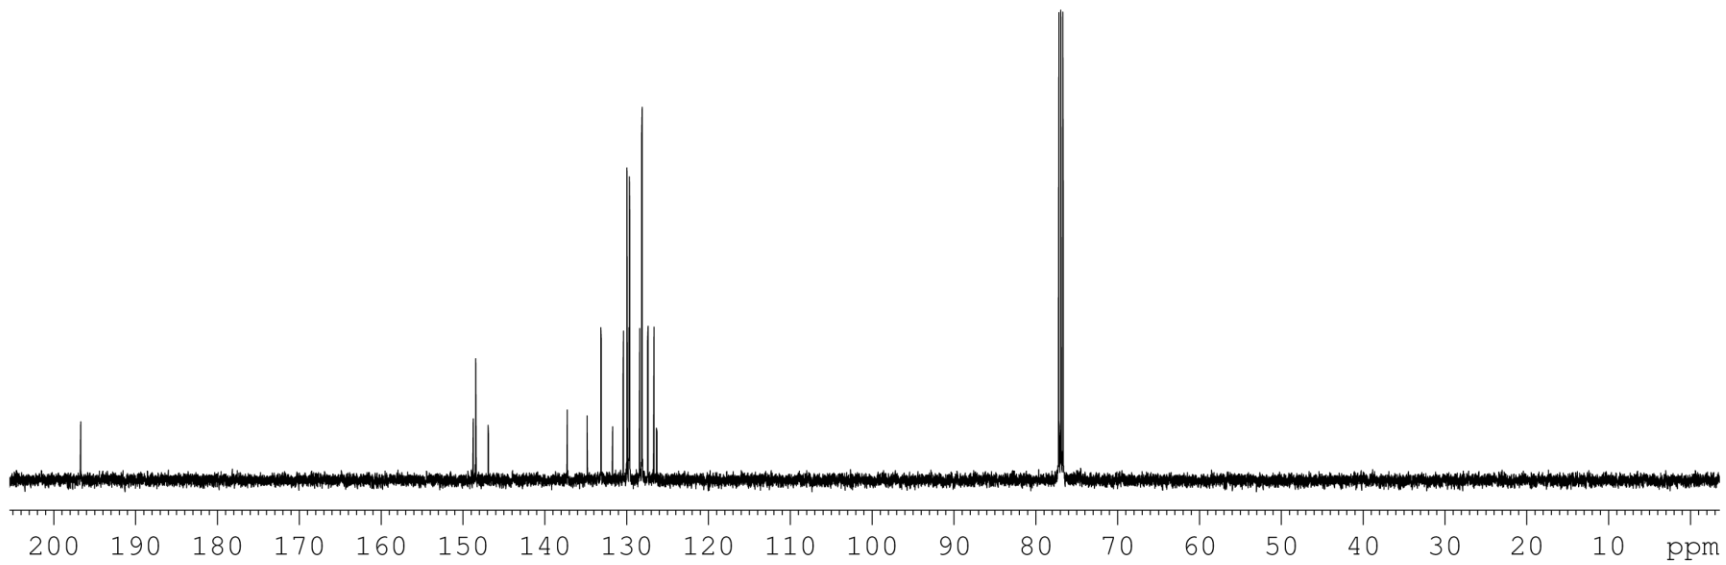

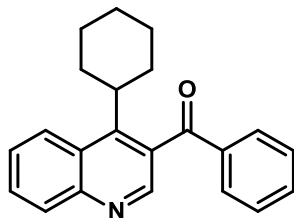

4v

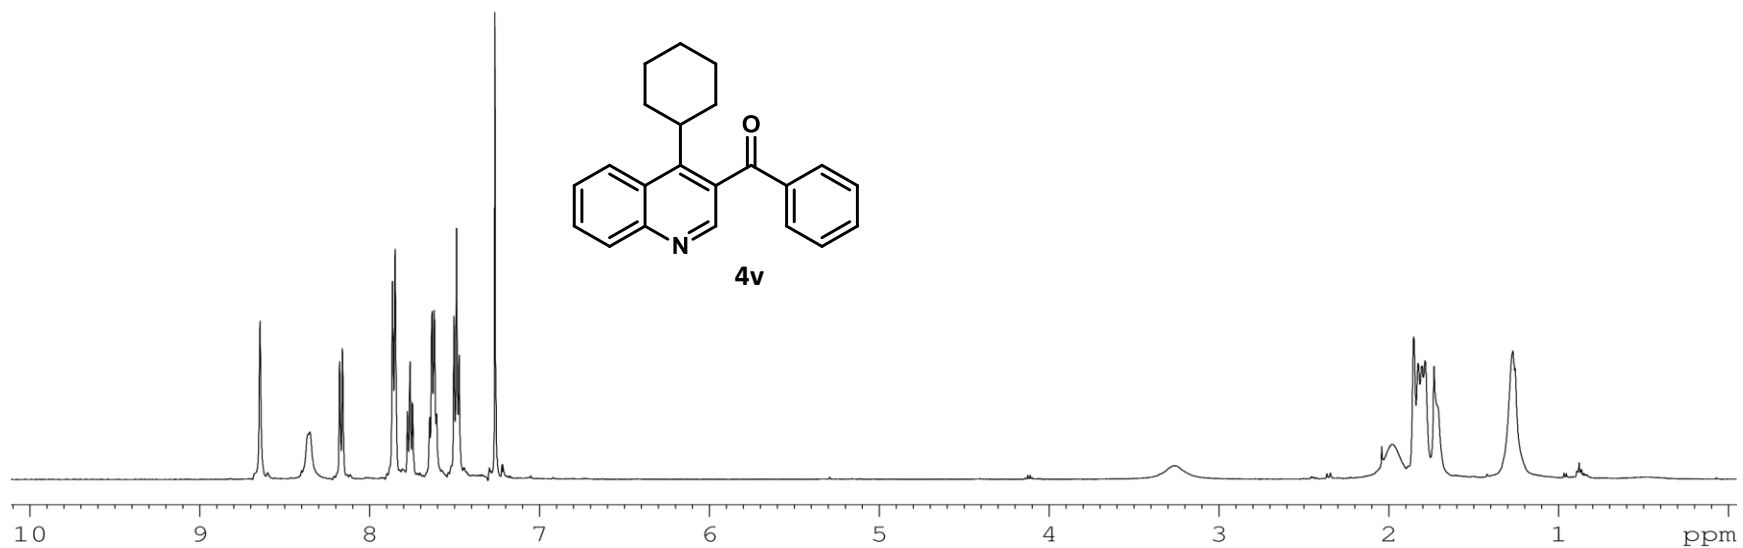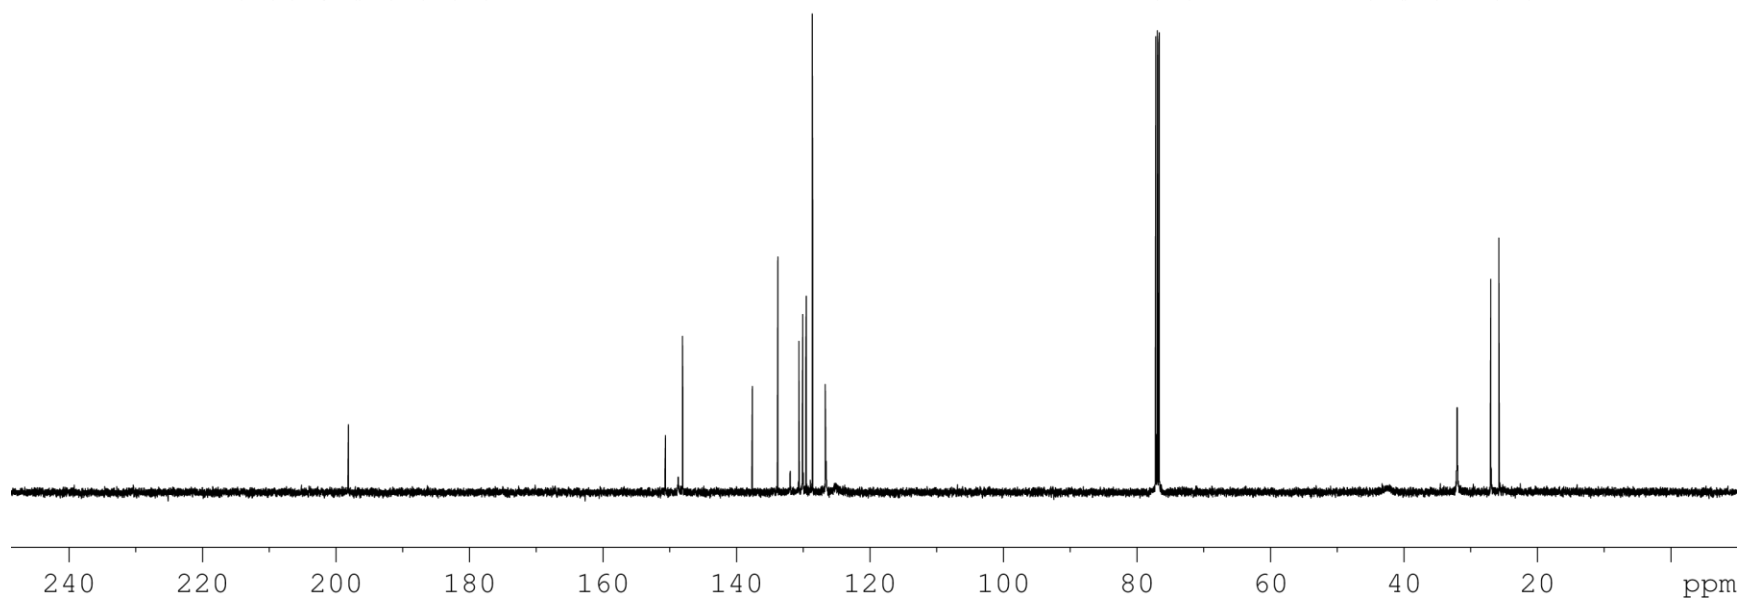



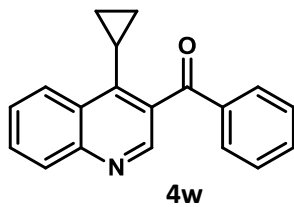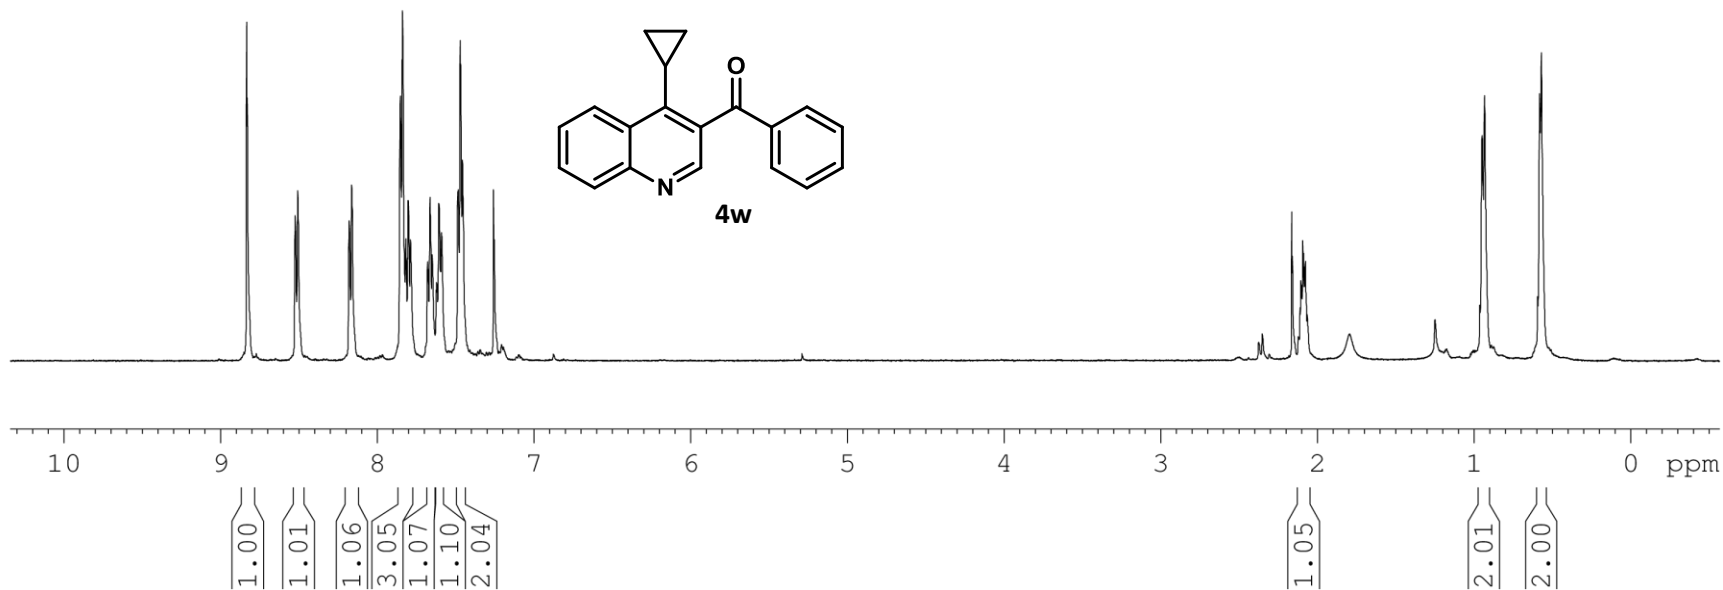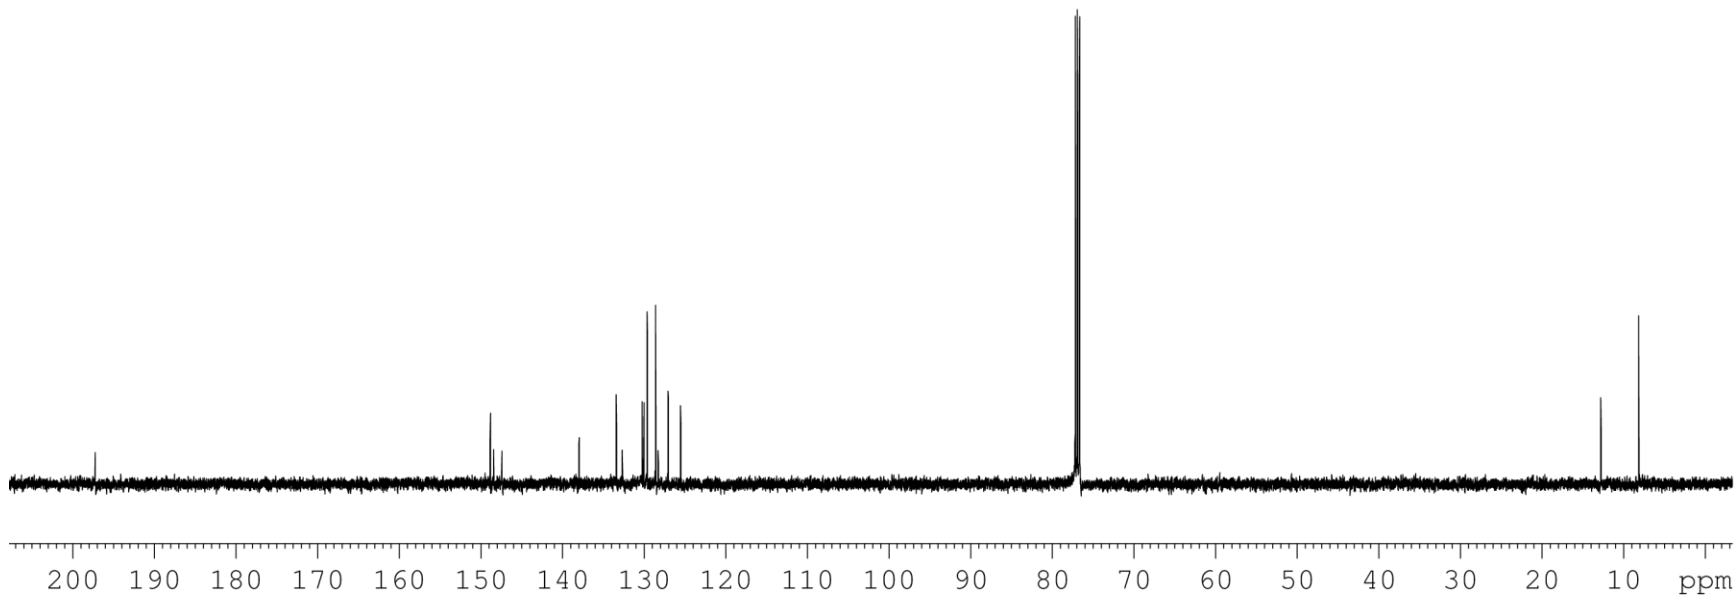

Supplement: NIHMS404426-supplement-1_si_001.pdf [file NIHMS404426-supplement-1_si_001.pdf]
